# Supplementary material for: Sponge-Derived 24-Homoscalaranes as Potent Anti-Inflammatory Agents
Source: MDPI journal article supplement (doi:10.3390/md18090434), 2020-08-19
Supplement: s1 [file s1]

## Supporting Information

| No   | Content                                                                                  | page |
|------|------------------------------------------------------------------------------------------|------|
| S1.  | HRESIMS spectrum of compound <b>1</b> .                                                  | 3    |
| S2.  | <sup>1</sup> H NMR spectrum (400 MHz) of compound <b>1</b> in CDCl <sub>3</sub> .        | 3    |
| S3.  | <sup>13</sup> C NMR spectrum (100 MHz) of compound <b>1</b> in CDCl <sub>3</sub> .       | 4    |
| S4.  | DEPT spectrum (100 MHz) of compound <b>1</b> in CDCl <sub>3</sub> .                      | 4    |
| S5.  | HSQC spectrum of compound <b>1</b> in CDCl <sub>3</sub> .                                | 5    |
| S6.  | HMBC spectrum of compound <b>1</b> in CDCl <sub>3</sub> .                                | 5    |
| S7.  | <sup>1</sup> H– <sup>1</sup> H COSY spectrum of compound <b>1</b> in CDCl <sub>3</sub> . | 6    |
| S8.  | NOESY spectrum of compound <b>1</b> in CDCl <sub>3</sub> .                               | 6    |
| S9.  | HRESIMS spectrum of compound <b>2</b> .                                                  | 7    |
| S10. | <sup>1</sup> H NMR spectrum (400 MHz) of compound <b>2</b> in CDCl <sub>3</sub> .        | 7    |
| S11. | <sup>13</sup> C NMR spectrum (100 MHz) of compound <b>2</b> in CDCl <sub>3</sub> .       | 8    |
| S12. | DEPT spectrum (100 MHz) of compound <b>2</b> in CDCl <sub>3</sub> .                      | 8    |
| S13. | HSQC spectrum of compound <b>2</b> in CDCl <sub>3</sub> .                                | 9    |
| S14. | HMBC spectrum of compound <b>2</b> in CDCl <sub>3</sub> .                                | 9    |
| S15. | <sup>1</sup> H– <sup>1</sup> H COSY spectrum of compound <b>2</b> in CDCl <sub>3</sub> . | 10   |
| S16. | NOESY spectrum of compound <b>2</b> in CDCl <sub>3</sub> .                               | 10   |
| S17. | HRESIMS spectrum of compound <b>3</b> .                                                  | 11   |
| S18. | <sup>1</sup> H NMR spectrum (400 MHz) of compound <b>3</b> in CDCl <sub>3</sub> .        | 11   |
| S19. | <sup>13</sup> C NMR spectrum (100 MHz) of compound <b>3</b> in CDCl <sub>3</sub> .       | 12   |
| S20. | DEPT spectrum (100 MHz) of compound <b>3</b> in CDCl <sub>3</sub> .                      | 12   |
| S21. | HSQC spectrum of compound <b>3</b> in CDCl <sub>3</sub> .                                | 13   |
| S22. | HMBC spectrum of compound <b>3</b> in CDCl <sub>3</sub> .                                | 13   |
| S23. | <sup>1</sup> H– <sup>1</sup> H COSY spectrum of compound <b>3</b> in CDCl <sub>3</sub> . | 14   |
| S24. | NOESY spectrum of compound <b>3</b> in CDCl <sub>3</sub> .                               | 14   |
| S25. | HRESIMS spectrum of compound <b>4</b> .                                                  | 15   |
| S26. | <sup>1</sup> H NMR spectrum (400 MHz) of compound <b>4</b> in CDCl <sub>3</sub> .        | 15   |
| S27. | <sup>13</sup> C NMR spectrum (100 MHz) of compound <b>4</b> in CDCl <sub>3</sub> .       | 16   |
| S28. | DEPT spectrum (100 MHz) of compound <b>4</b> in CDCl <sub>3</sub> .                      | 16   |
| S29. | HSQC spectrum of compound <b>4</b> in CDCl <sub>3</sub> .                                | 17   |
| S30. | HMBC spectrum of compound <b>4</b> in CDCl <sub>3</sub> .                                | 17   |
| S31. | <sup>1</sup> H– <sup>1</sup> H COSY spectrum of compound <b>4</b> in CDCl <sub>3</sub> . | 18   |
| S32. | NOESY spectrum of compound <b>4</b> in CDCl <sub>3</sub> .                               | 18   |
| S33. | HRESIMS spectrum of compound <b>5</b> .                                                  | 19   |
| S34. | <sup>1</sup> H NMR spectrum (400 MHz) of compound <b>5</b> in CDCl <sub>3</sub> .        | 19   |
| S35. | <sup>13</sup> C NMR spectrum (100 MHz) of compound <b>5</b> in CDCl <sub>3</sub> .       | 20   |
| S36. | DEPT spectrum (100 MHz) of compound <b>5</b> in CDCl <sub>3</sub> .                      | 20   |
| S37. | HSQC spectrum of compound <b>5</b> in CDCl <sub>3</sub> .                                | 21   |
| S38. | HMBC spectrum of compound <b>5</b> in CDCl <sub>3</sub> .                                | 21   |
| S39. | <sup>1</sup> H– <sup>1</sup> H COSY spectrum of compound <b>5</b> in CDCl <sub>3</sub> . | 22   |

|     |                                                                                          |    |
|-----|------------------------------------------------------------------------------------------|----|
| S40 | NOESY spectrum of compound <b>5</b> in CDCl <sub>3</sub> .                               | 22 |
| S41 | HRESIMS spectrum of compound <b>6</b> .                                                  | 23 |
| S42 | <sup>1</sup> H NMR spectrum (600 MHz) of compound <b>6</b> in CDCl <sub>3</sub> .        | 23 |
| S43 | <sup>13</sup> C NMR spectrum (150 MHz) of compound <b>6</b> in CDCl <sub>3</sub> .       | 24 |
| S44 | HSQC spectrum of compound <b>6</b> in CDCl <sub>3</sub> .                                | 24 |
| S45 | HMBC spectrum of compound <b>6</b> in CDCl <sub>3</sub> .                                | 25 |
| S46 | <sup>1</sup> H– <sup>1</sup> H COSY spectrum of compound <b>6</b> in CDCl <sub>3</sub> . | 25 |
| S47 | NOESY spectrum of compound <b>6</b> in CDCl <sub>3</sub> .                               | 26 |

---

## Mass Spectrum SmartFormula Report

### Analysis Info

Analysis Name: D:\Data\2\R101021\_000005.d  
 Method: broadband first signal  
 Sample Name: R-10-10-2-1  
 Comment: ESI Positive

11/25/2019 12:59:34 PM  
 Operator: YU HSIAO-CHING  
 Instrument: BRUKER FT-MS solarix

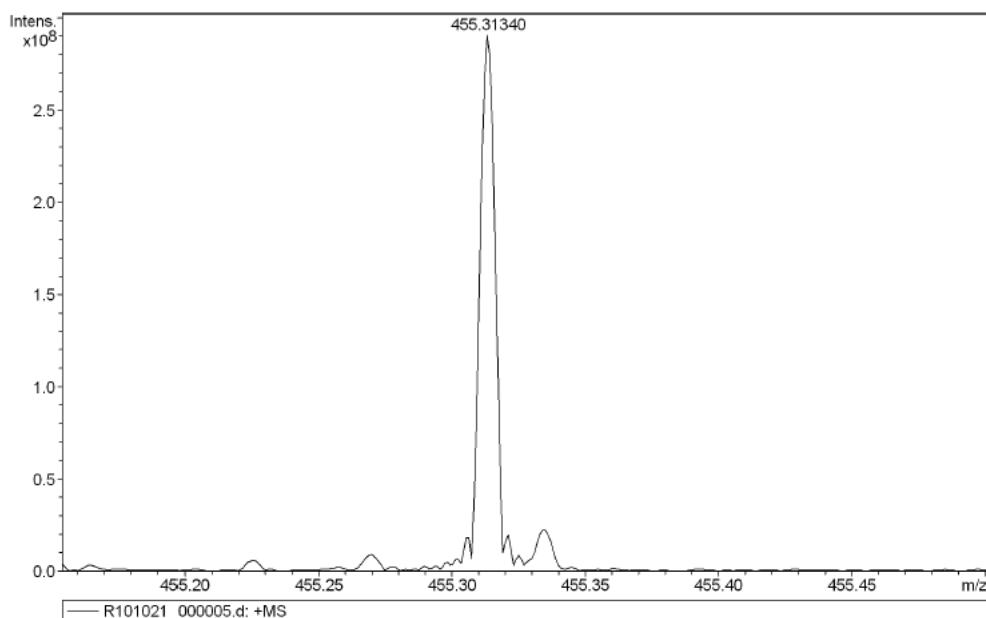

| Meas. m/z | # | Formula          | Score  | m/z       | err [mDa] | err [ppm] | mSigma | rdb | e <sup>-</sup> | Conf | N-Rule |
|-----------|---|------------------|--------|-----------|-----------|-----------|--------|-----|----------------|------|--------|
| 455.31340 | 1 | C 27 H 44 Na O 4 | 100.00 | 455.31318 | -0.21     | -0.47     | 10.0   | 5.5 | even           |      | ok     |

S1. HRESIMS spectrum of compound **1**.

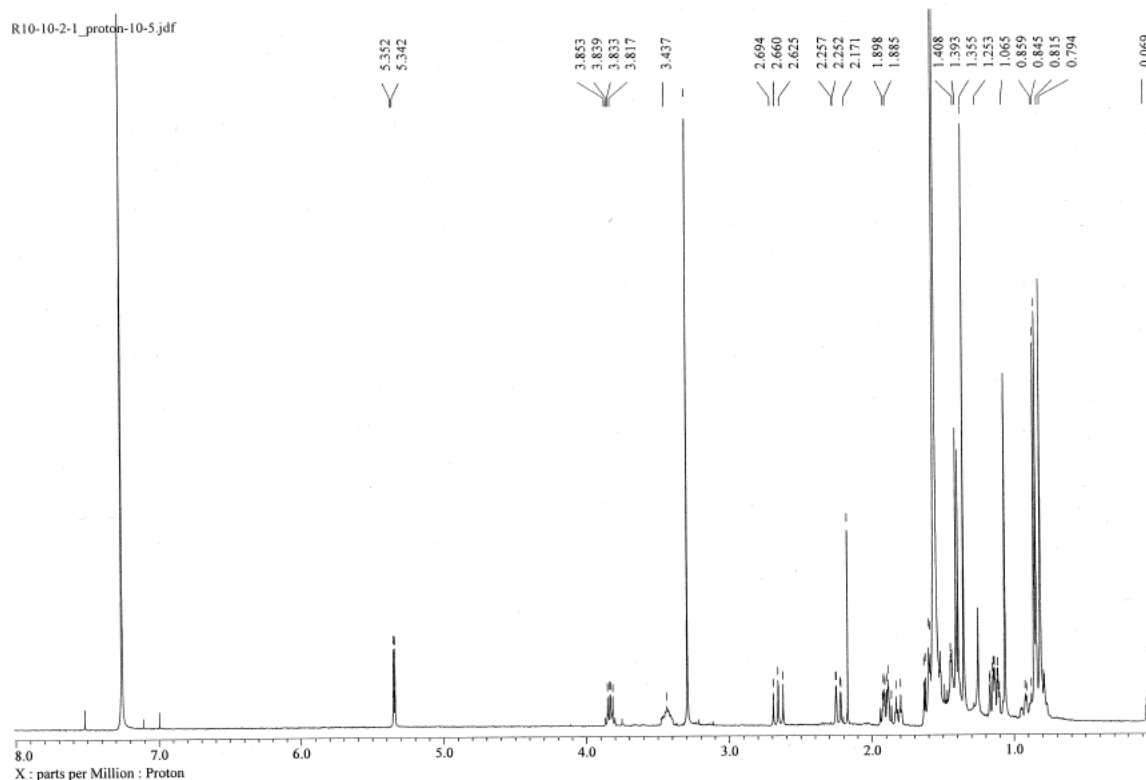

S2. <sup>1</sup>H NMR spectrum (400 MHz) of compound **1** in CDCl<sub>3</sub>.

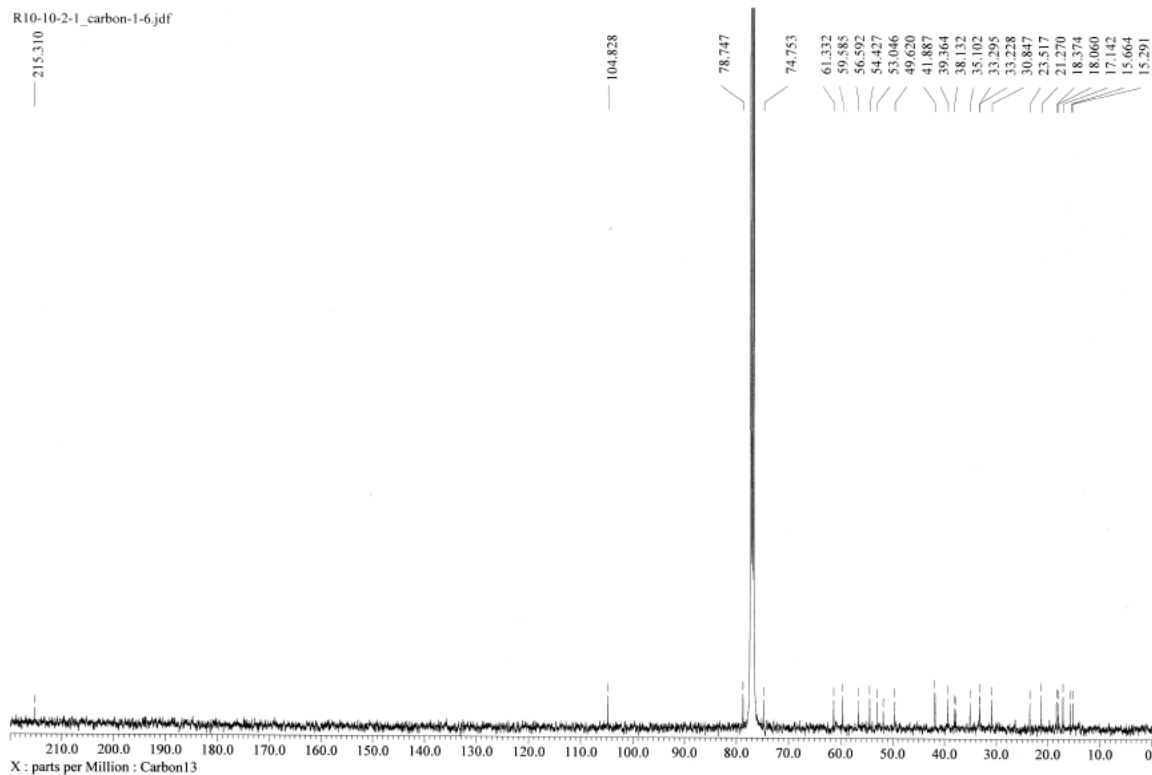

S3.  $^{13}\text{C}$  NMR spectrum (100 MHz) of compound **1** in  $\text{CDCl}_3$ .

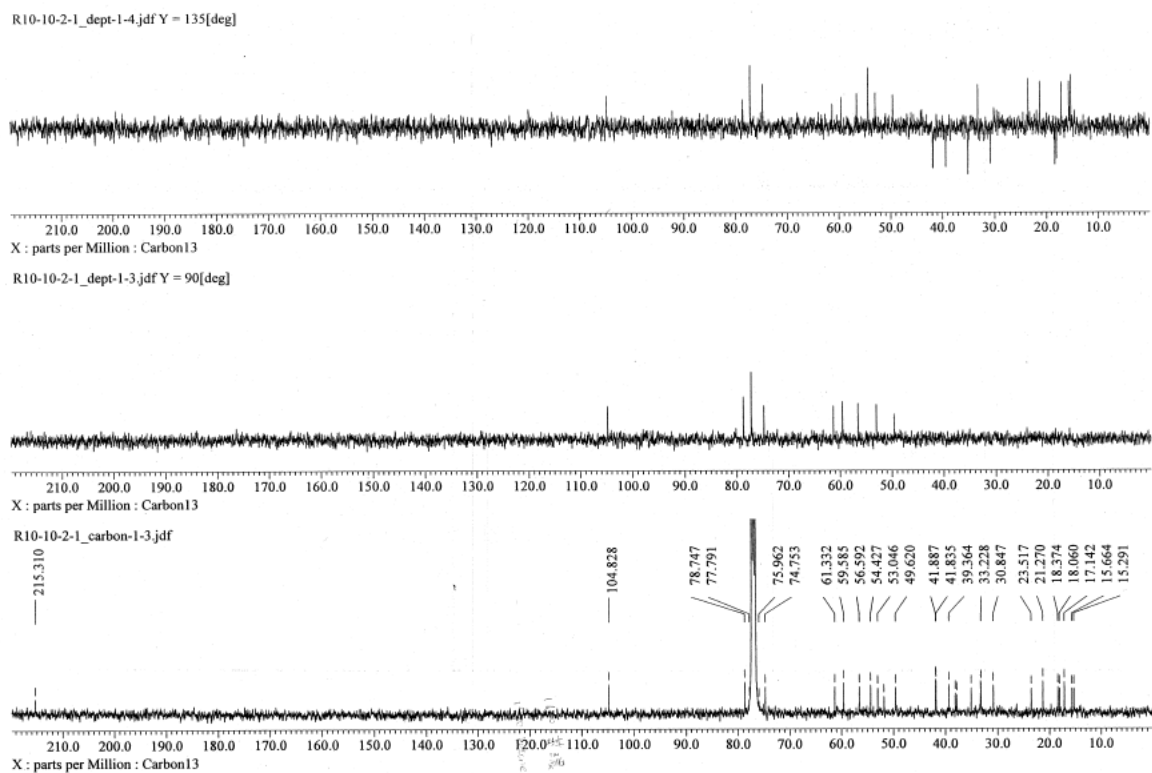

S4. DEPT spectrum (100 MHz) of compound **1** in  $\text{CDCl}_3$

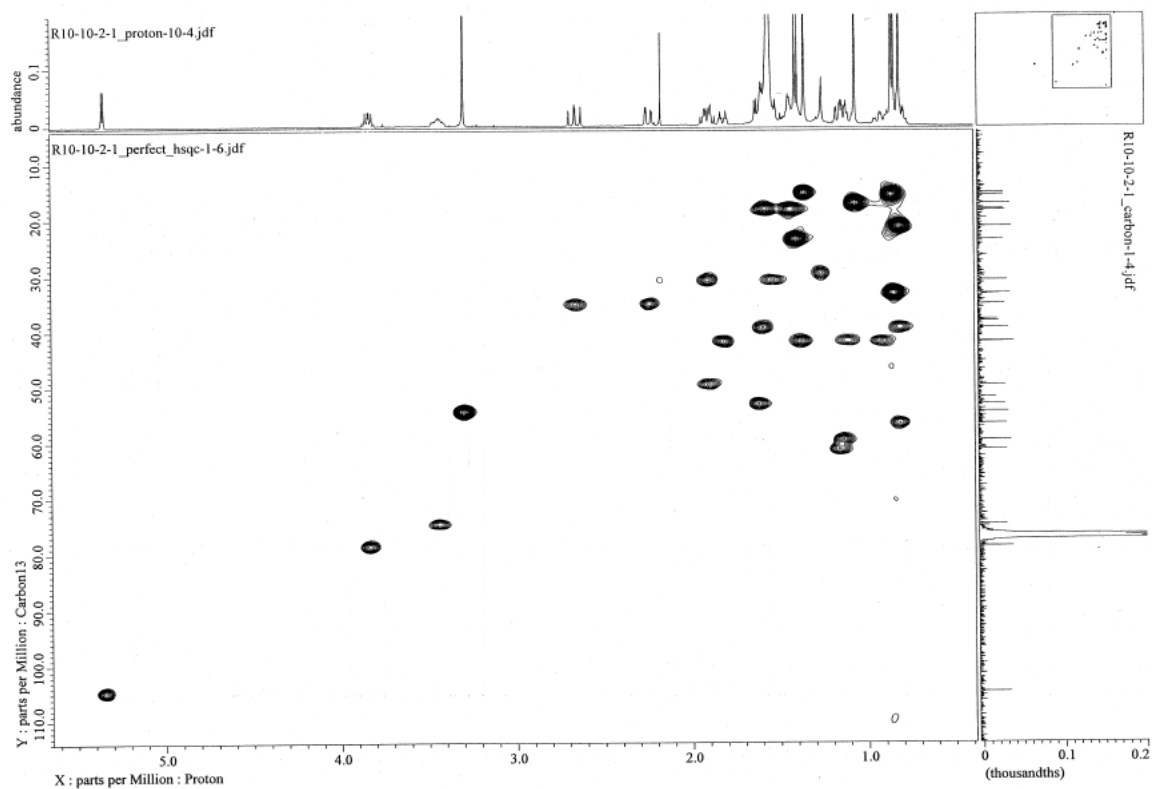

S5. HSQC spectrum of compound **1** in  $\text{CDCl}_3$ .

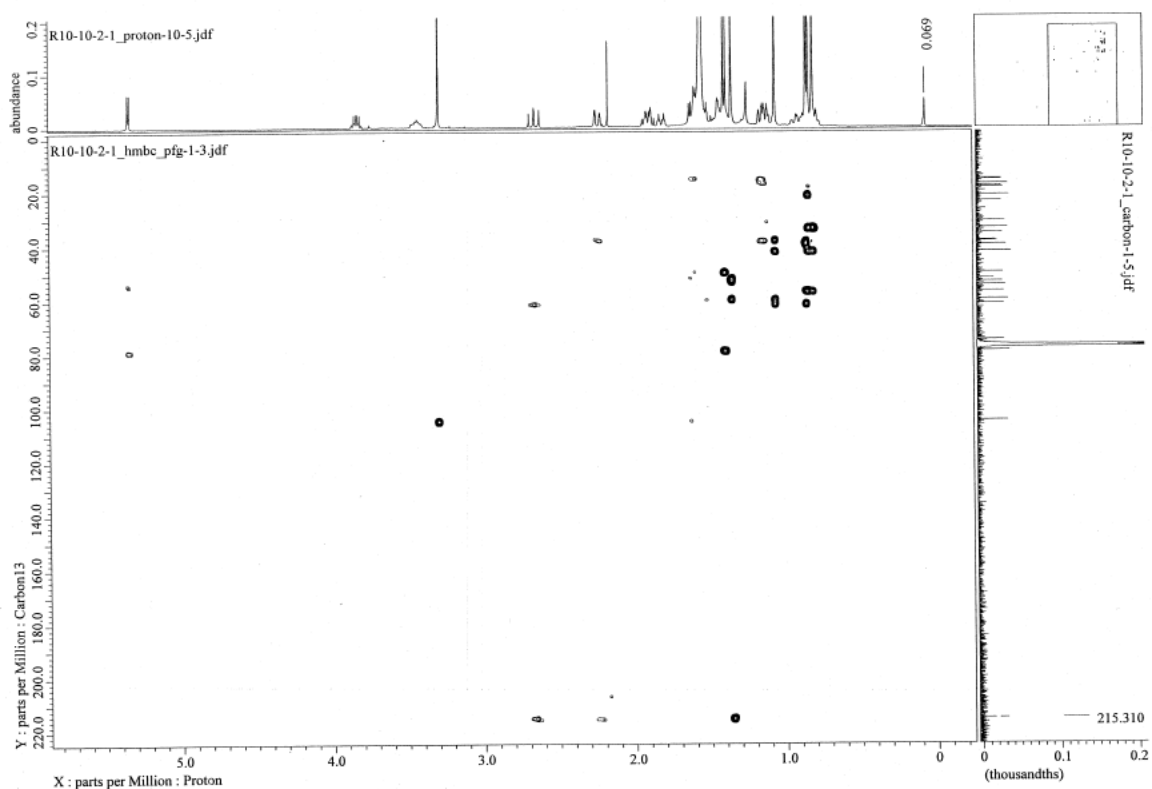

S6. HMBC spectrum of compound **1** in  $\text{CDCl}_3$ .

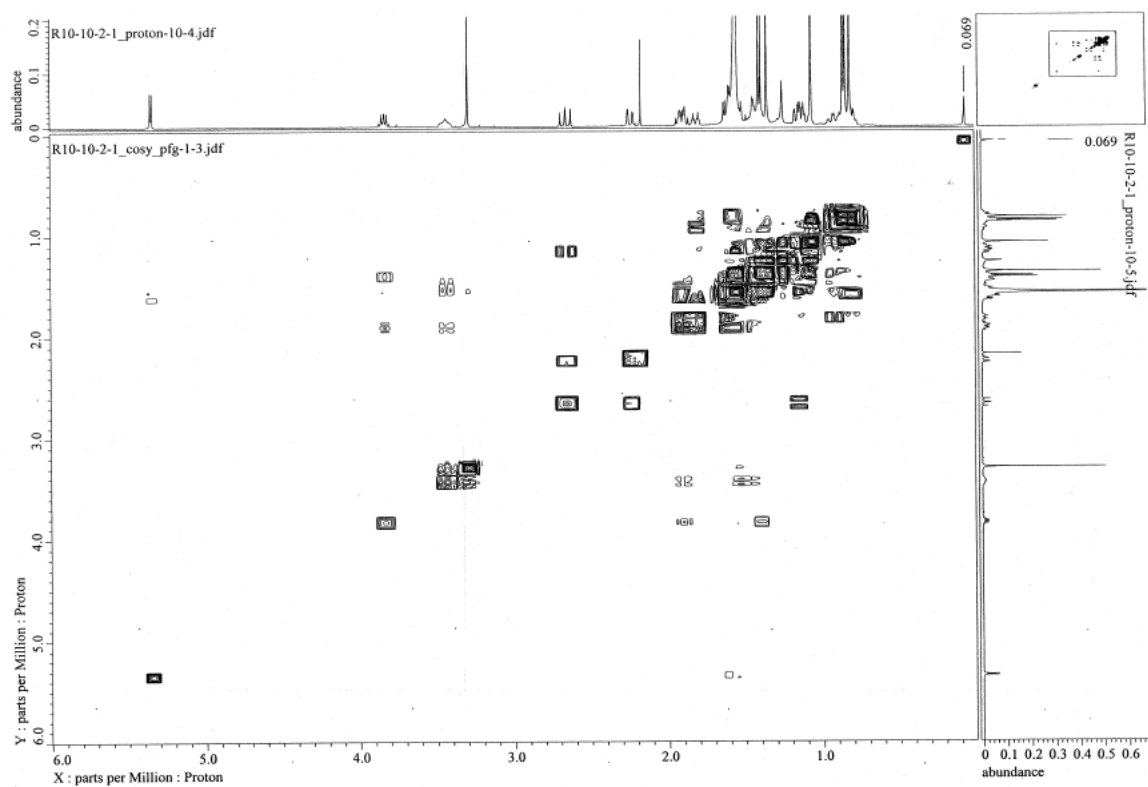

S7.  $^1\text{H}$ - $^1\text{H}$  COSY spectrum of compound **1** in  $\text{CDCl}_3$ .

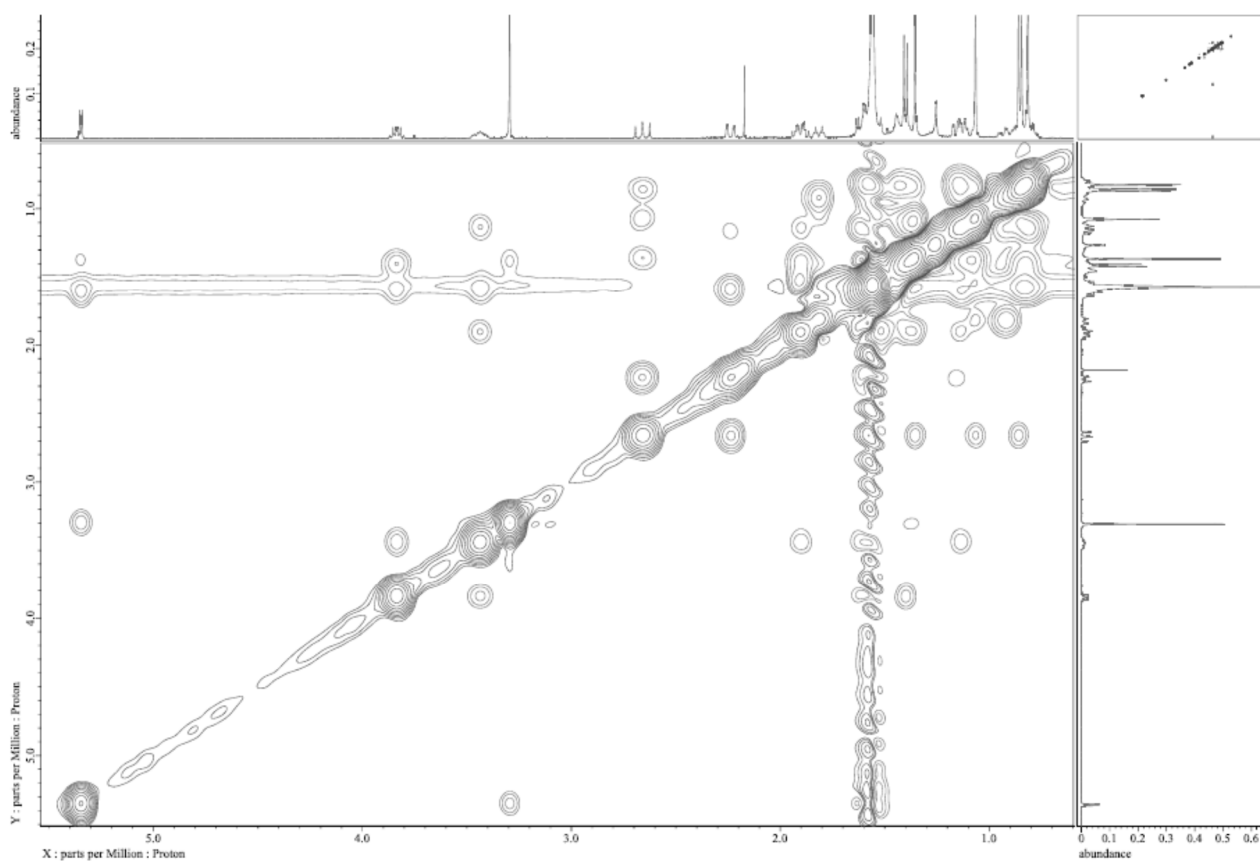

S8. NOESY spectrum of compound **1** in  $\text{CDCl}_3$

## Mass Spectrum SmartFormula Report

### Analysis Info

Analysis Name D:\Data\2\R10104\_000002.d  
 Method broadband first signal  
 Sample Name R-10-10-4  
 Comment ESI Positive

11/25/2019 1:08:58 PM  
 Operator: YU HSIAO-CHING  
 Instrument: BRUKER FT-MS solarix

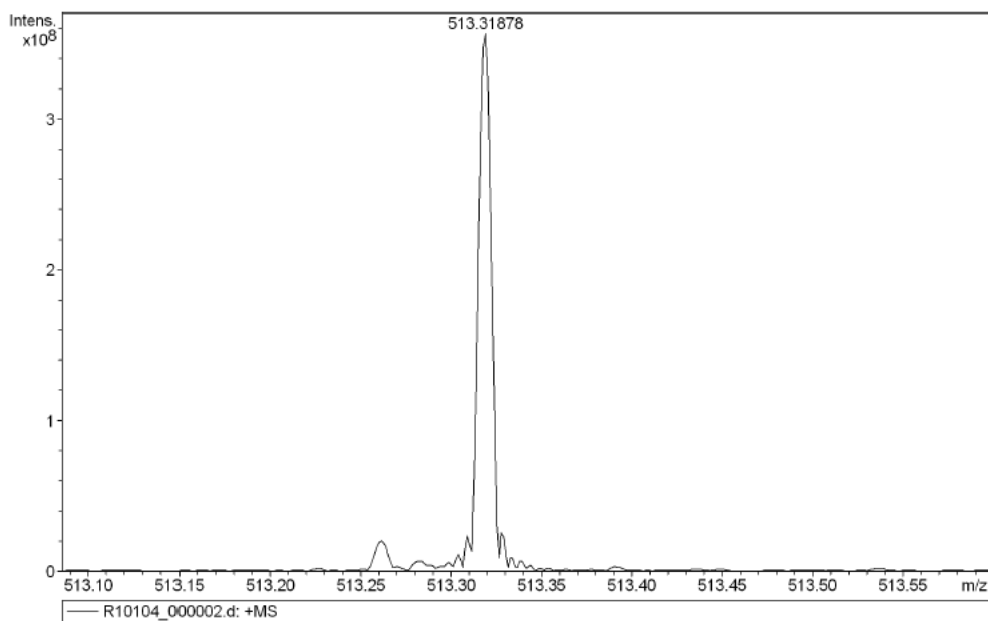

| Meas. m/z | # | Formula                                          | Score  | m/z       | err [mDa] | err [ppm] | mSigma | rdb | e <sup>-</sup> | Conf | N-Rule |
|-----------|---|--------------------------------------------------|--------|-----------|-----------|-----------|--------|-----|----------------|------|--------|
| 513.31878 | 1 | C <sub>29</sub> H <sub>46</sub> NaO <sub>6</sub> | 100.00 | 513.31866 | -0.12     | -0.23     | 7.4    | 6.5 | even           |      | ok     |

S9. HRESIMS spectrum of compound **2**.

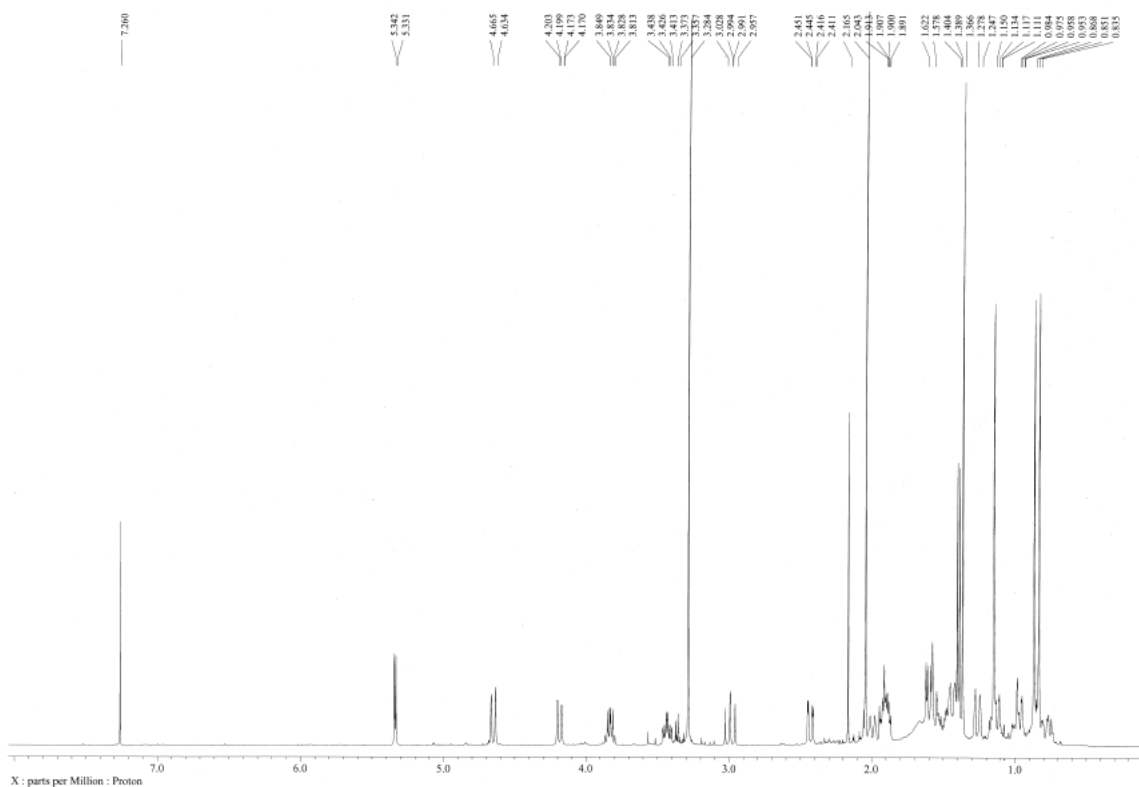

S10. <sup>1</sup>H NMR spectrum (400 MHz) of compound **2** in CDCl<sub>3</sub>.

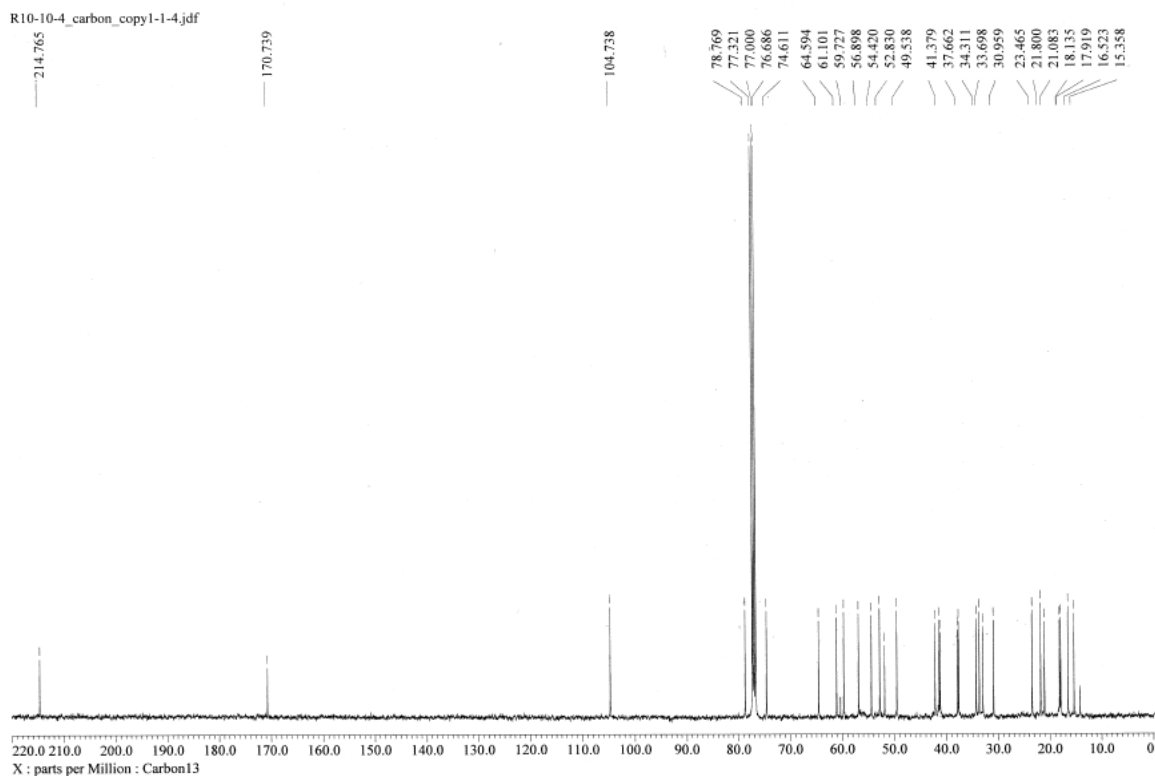

S11.  $^{13}\text{C}$  NMR spectrum (100 MHz) of compound **2** in  $\text{CDCl}_3$ .

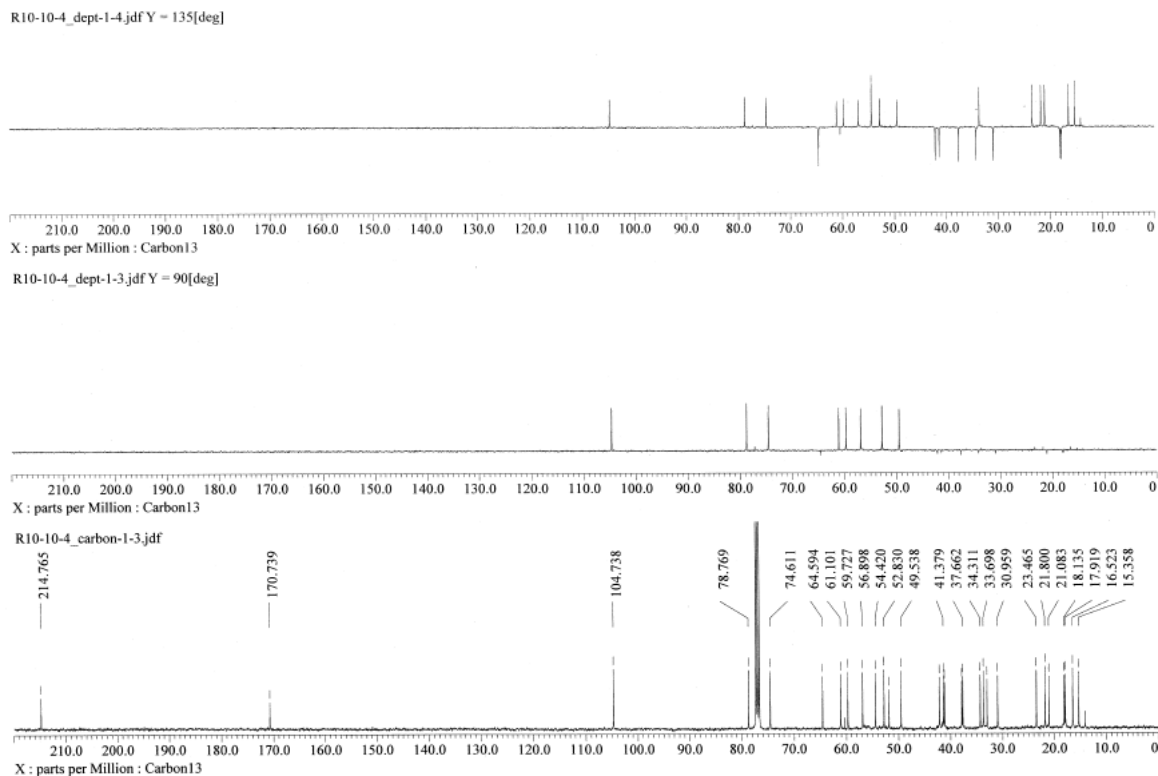

S12. DEPT spectrum (100 MHz) of compound **2** in  $\text{CDCl}_3$ .



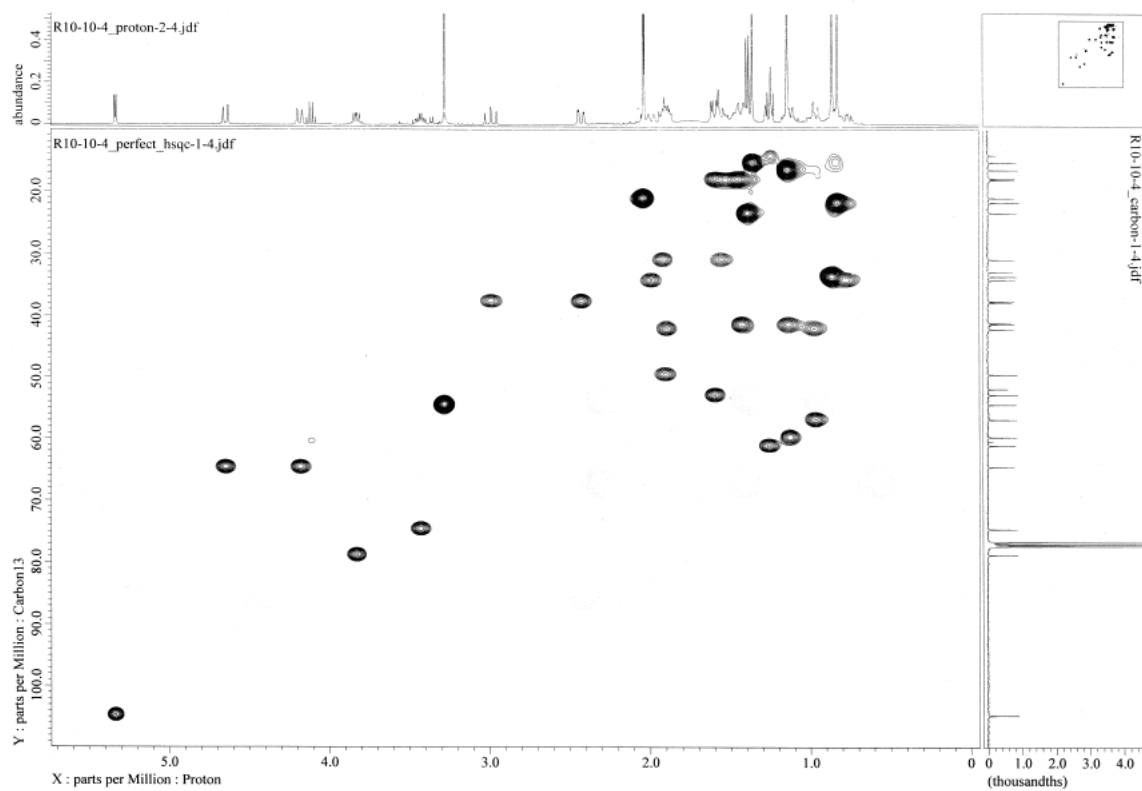

S13. HSQC spectrum of compound **2** in CDCl<sub>3</sub>.

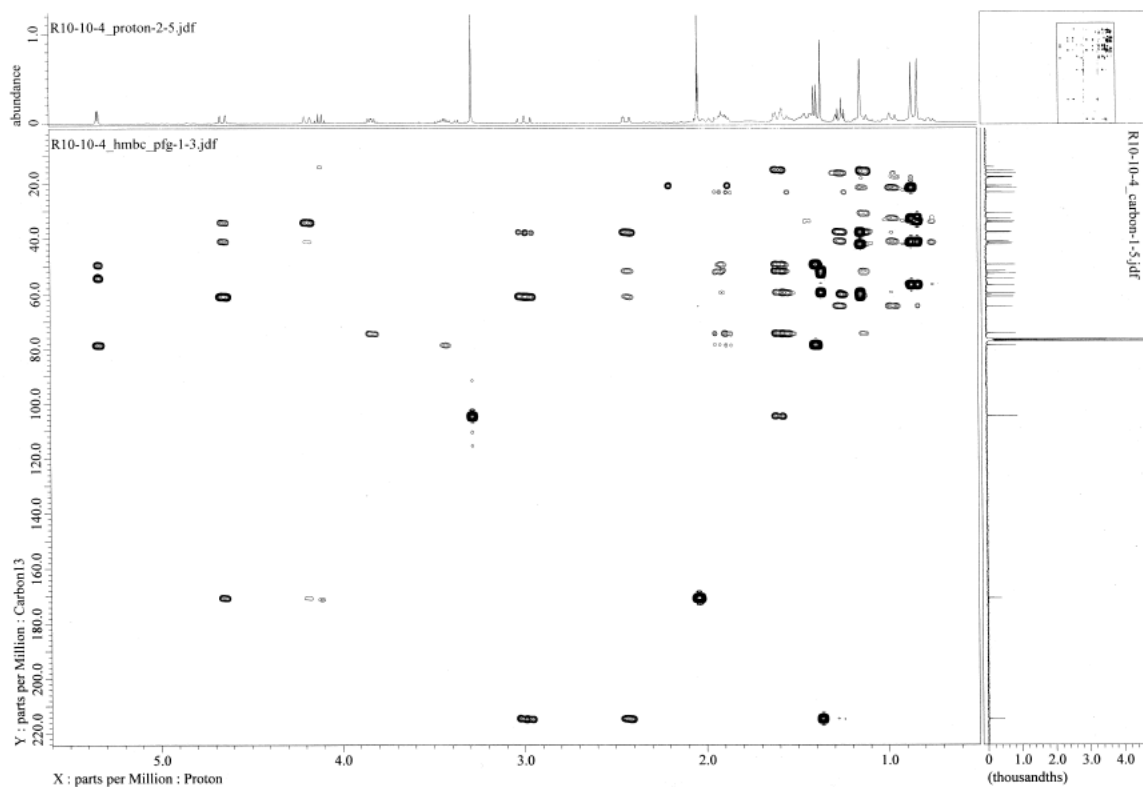

S14. HMBC spectrum of compound **2** in CDCl<sub>3</sub>.

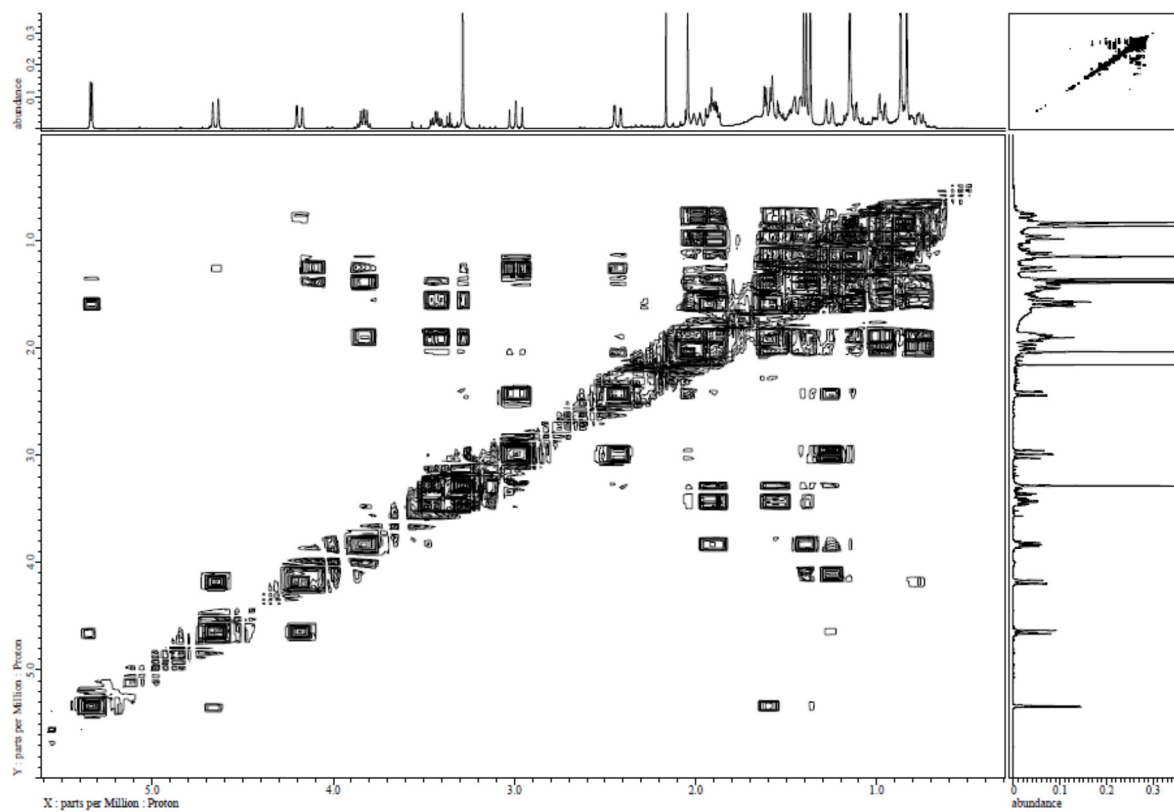

S15.  $^1\text{H}$ - $^1\text{H}$  COSY spectrum of compound **2** in  $\text{CDCl}_3$ .

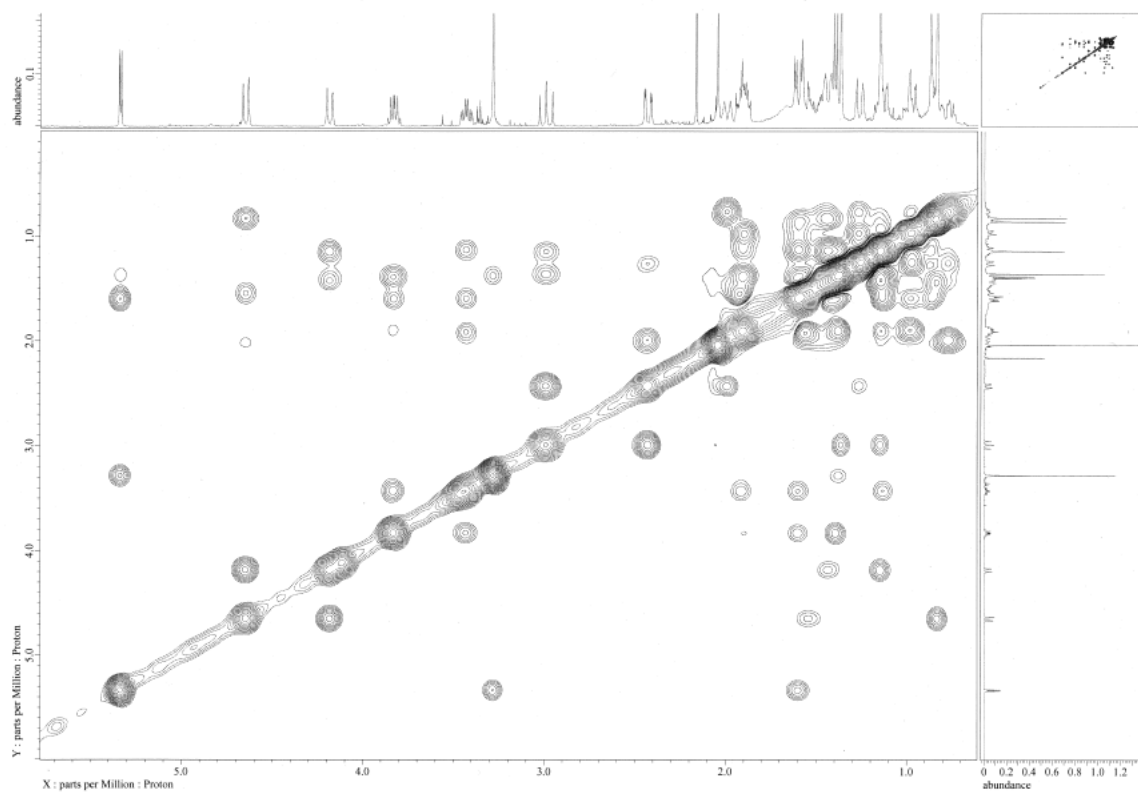

S16 NOESY spectrum of compound **2** in  $\text{CDCl}_3$

## Mass Spectrum SmartFormula Report

### Analysis Info

Analysis Name D:\Data\2\R10103\_000002.d  
 Method broadband first signal  
 Sample Name R-10-10-3  
 Comment ESI Positive

11/25/2019 1:03:34 PM  
 Operator: YU HSIAO-CHING  
 Instrument: BRUKER FT-MS solarix

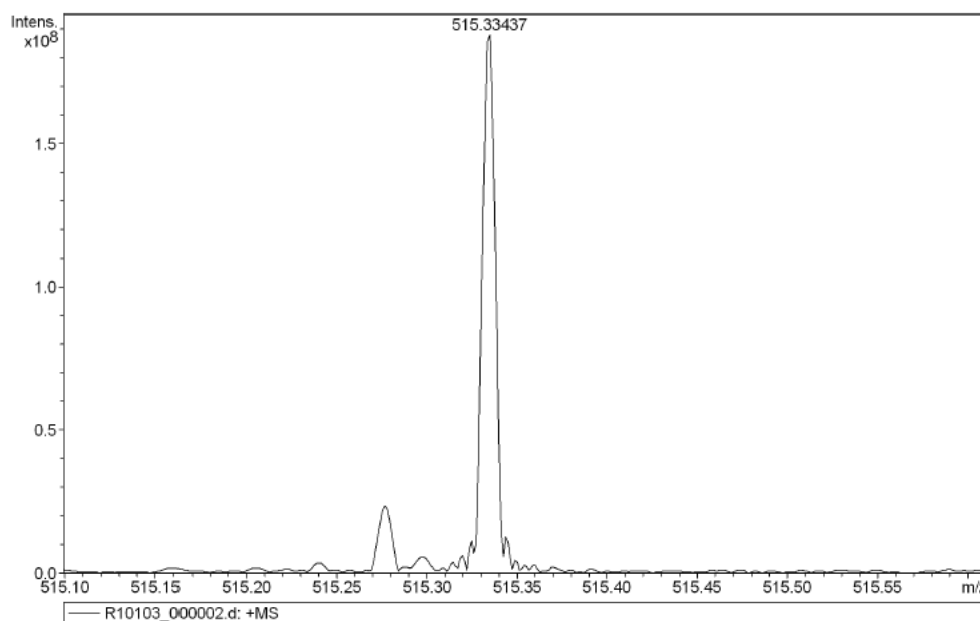

| Meas. m/z | # | Formula                                          | Score  | m/z       | err [mDa] | err [ppm] | mSigma | rdb | e <sup>-</sup> Conf | N-Rule |
|-----------|---|--------------------------------------------------|--------|-----------|-----------|-----------|--------|-----|---------------------|--------|
| 515.33437 | 1 | C <sub>29</sub> H <sub>48</sub> NaO <sub>6</sub> | 100.00 | 515.33431 | -0.06     | -0.12     | 10.5   | 5.5 | even                | ok     |

S17. HRESIMS spectrum of compound **3**.

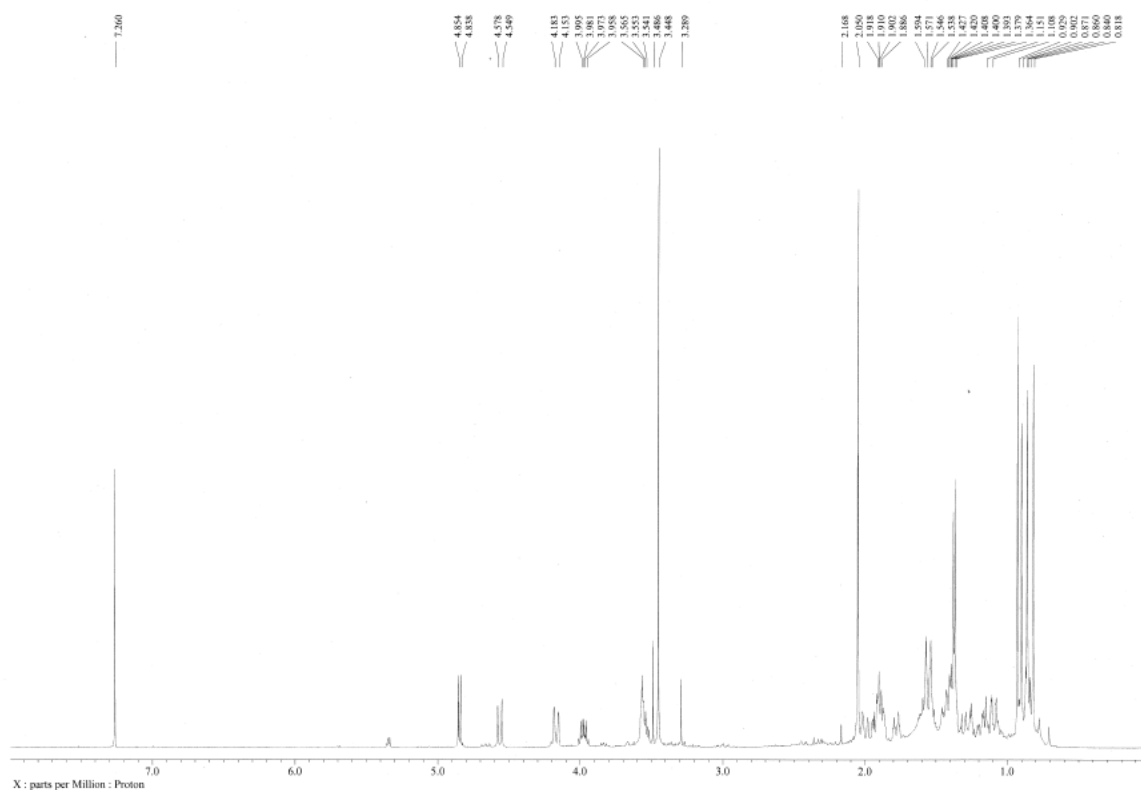

S18. <sup>1</sup>H NMR spectrum (400 MHz) of compound **3** in CDCl<sub>3</sub>.

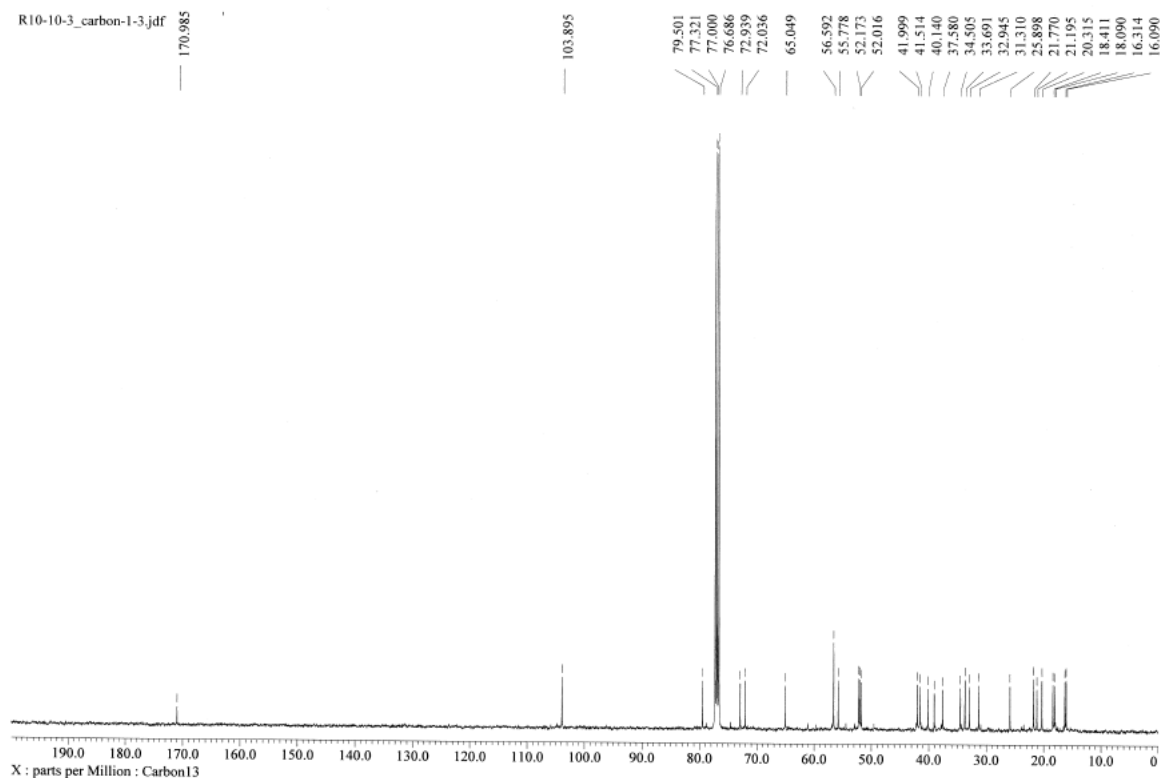

S19.  $^{13}\text{C}$  NMR spectrum (125 MHz) of compound **3** in  $\text{CDCl}_3$ .

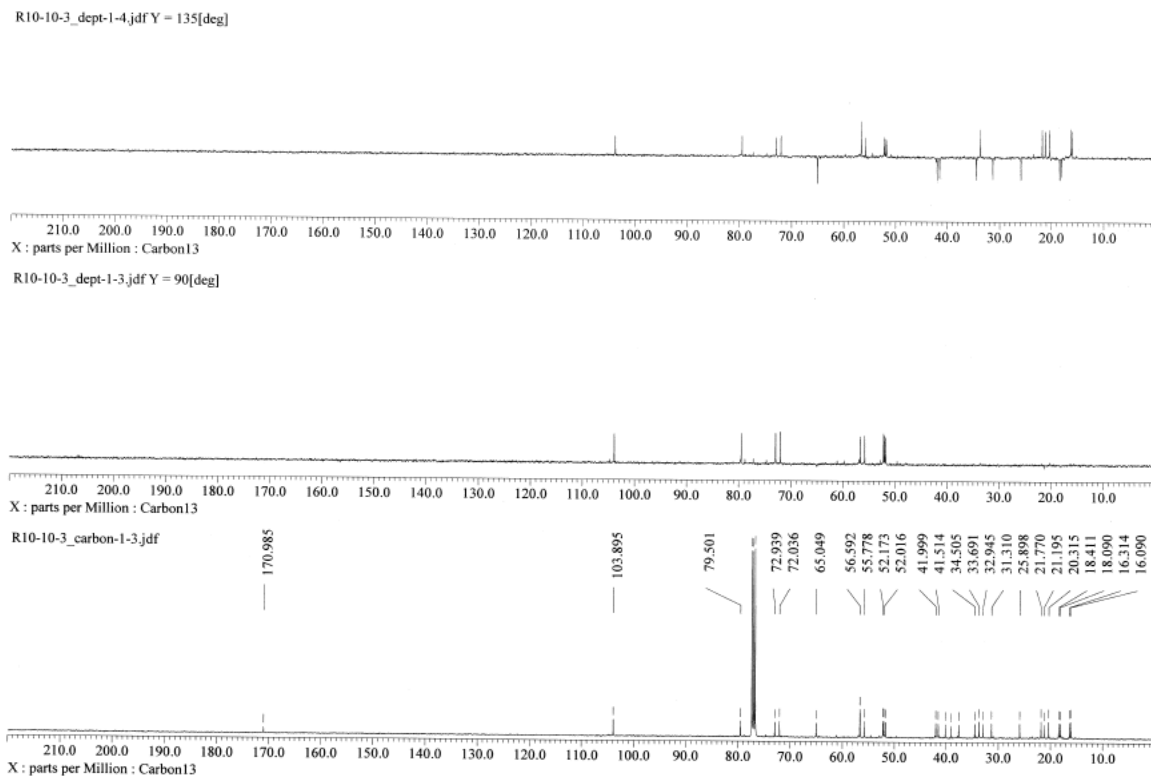

S20. DEPT spectrum (100 MHz) of compound **3** in  $\text{CDCl}_3$ .

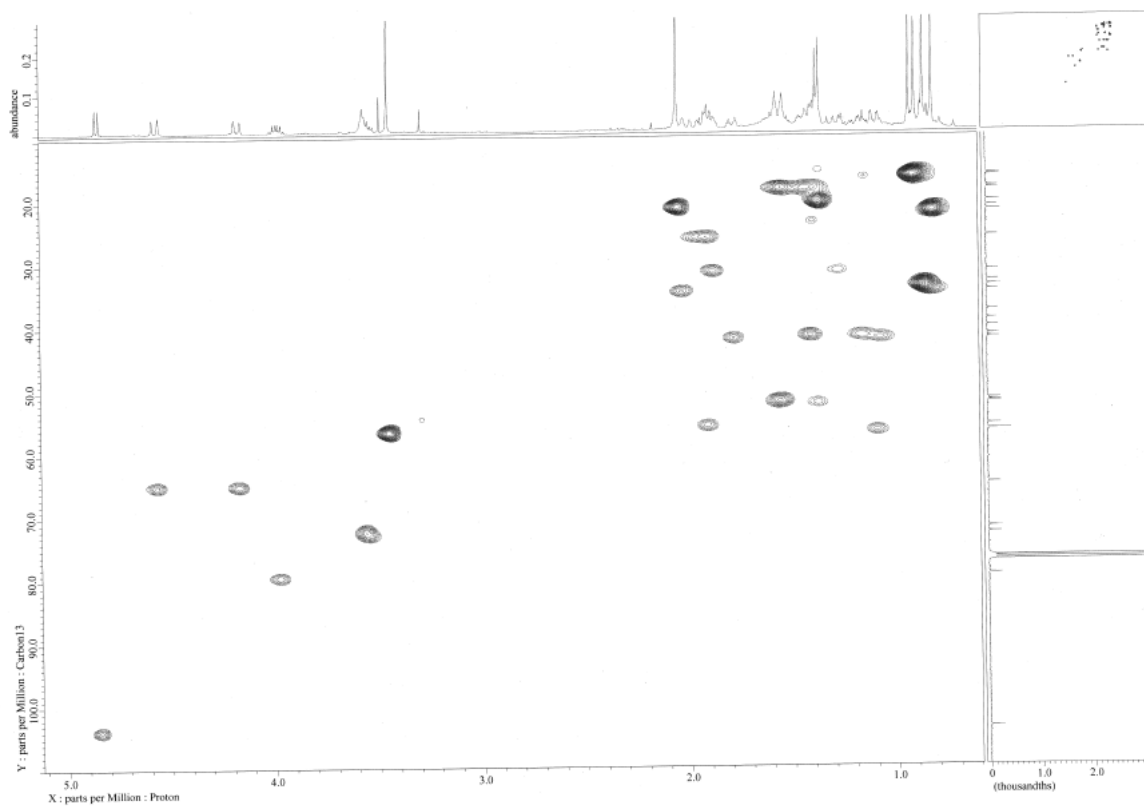

S21. HSQC spectrum of compound **3** in CDCl<sub>3</sub>.

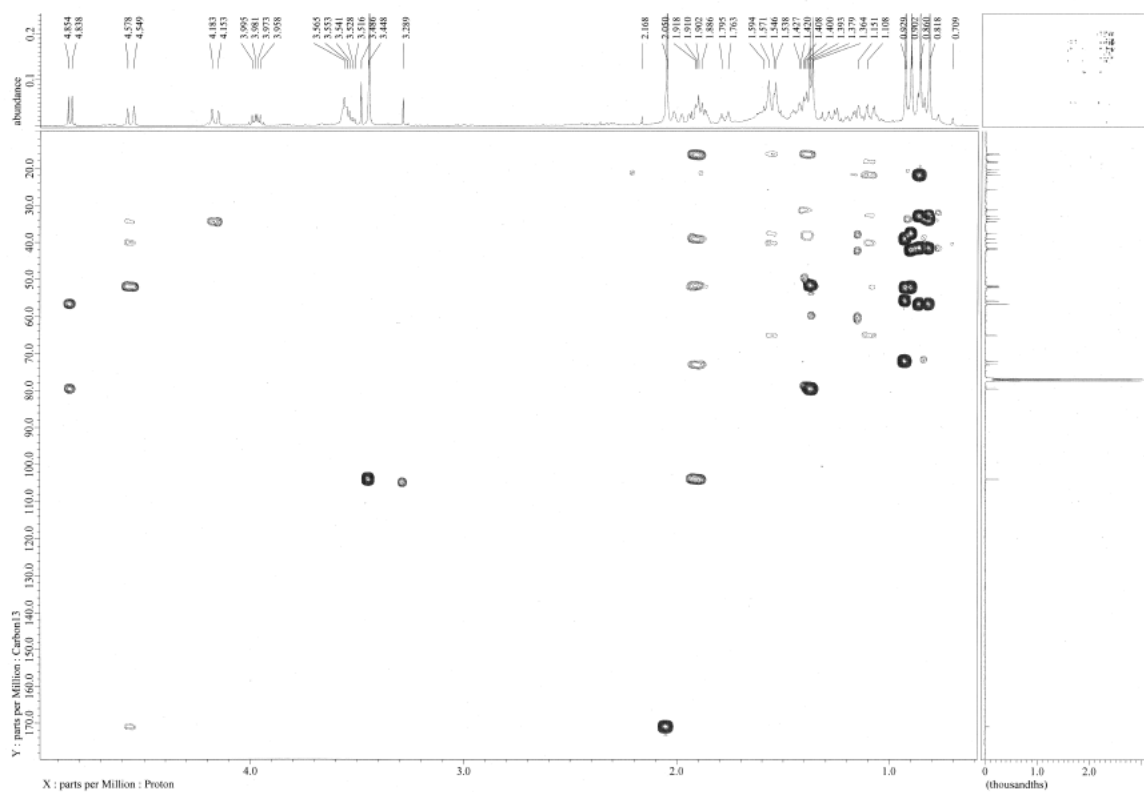

S22. HMBC spectrum of compound **3** in CDCl<sub>3</sub>.

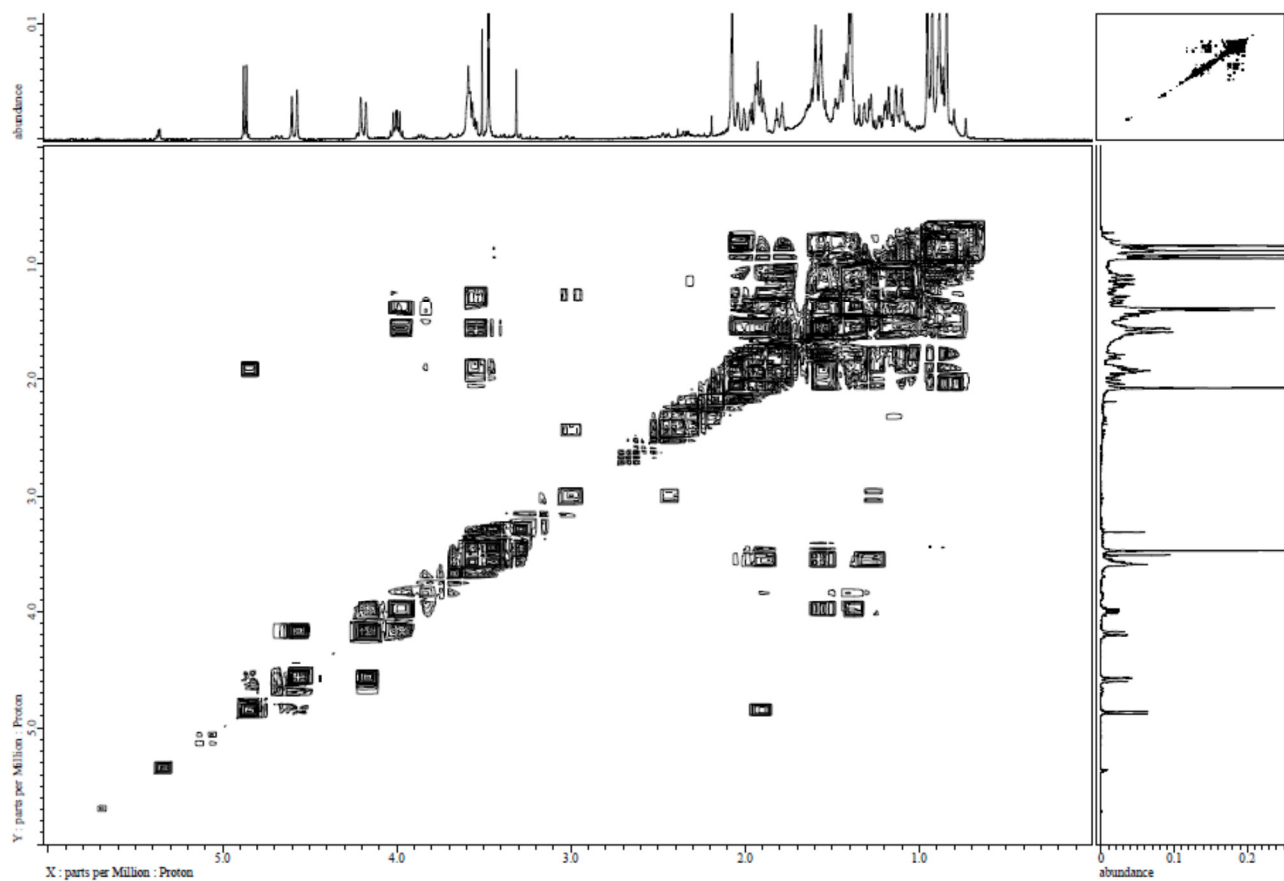

S23.  $^1\text{H}$ - $^1\text{H}$  COSY spectrum of compound **3** in  $\text{CDCl}_3$ .

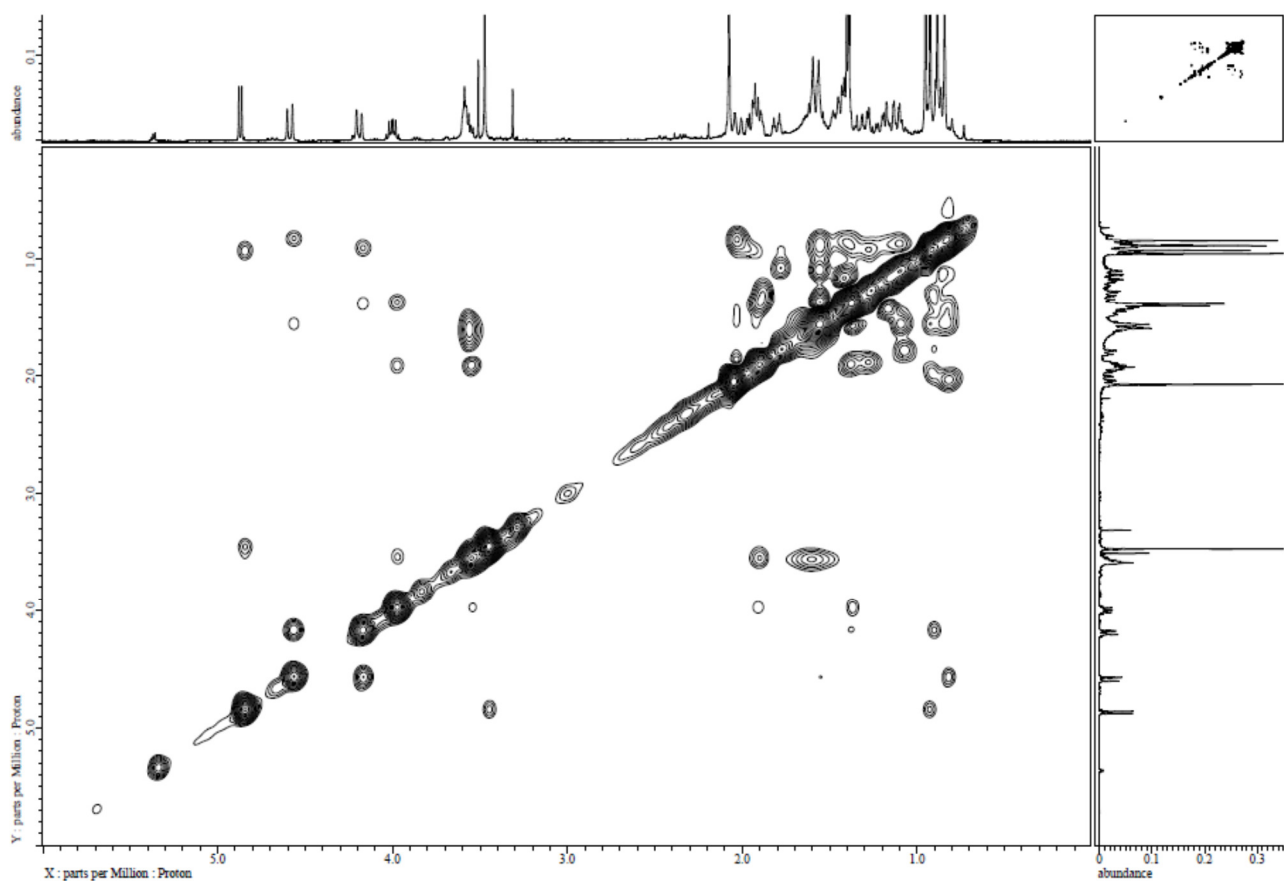

S24. NOESY spectrum of compound **3** in  $\text{CDCl}_3$

## Mass Spectrum SmartFormula Report

### Analysis Info

Analysis Name D:\Data\2\9172\_000002.d  
 Method broadband first signal  
 Sample Name R9-17-2  
 Comment ESI Positive

12/10/2019 4:47:05 PM  
 Operator: YU HSIAO-CHING  
 Instrument: BRUKER FT-MS solarix

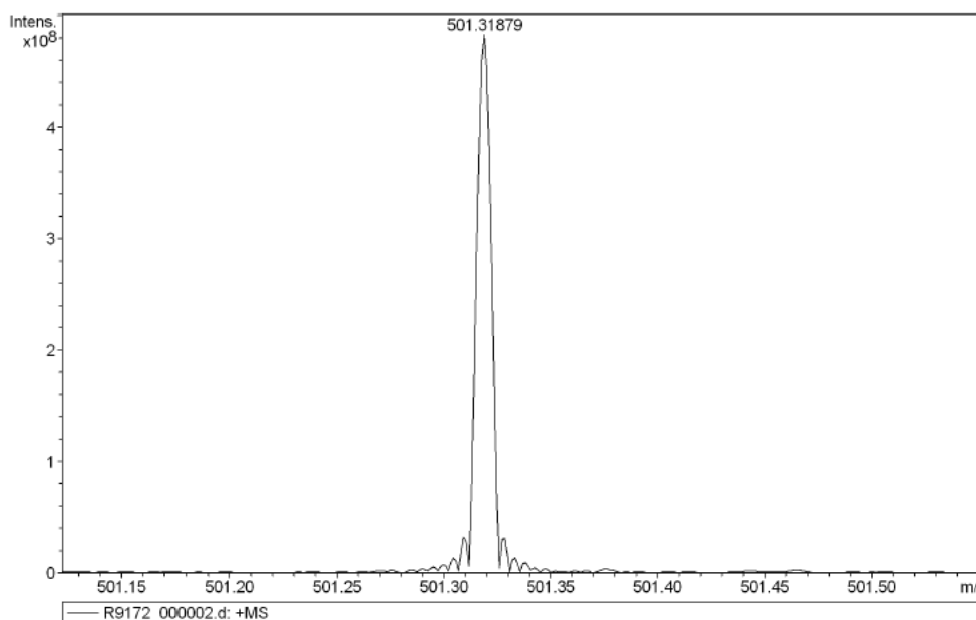

| Meas. m/z | # | Formula                                          | Score  | m/z       | err [mDa] | err [ppm] | mSigma | rdb | e <sup>-</sup> Conf | N-Rule |
|-----------|---|--------------------------------------------------|--------|-----------|-----------|-----------|--------|-----|---------------------|--------|
| 501.31879 | 1 | C <sub>28</sub> H <sub>46</sub> NaO <sub>6</sub> | 100.00 | 501.31866 | -0.13     | -0.26     | 10.5   | 5.5 | even                | ok     |

### S25. HRESIMS spectrum of compound 4.

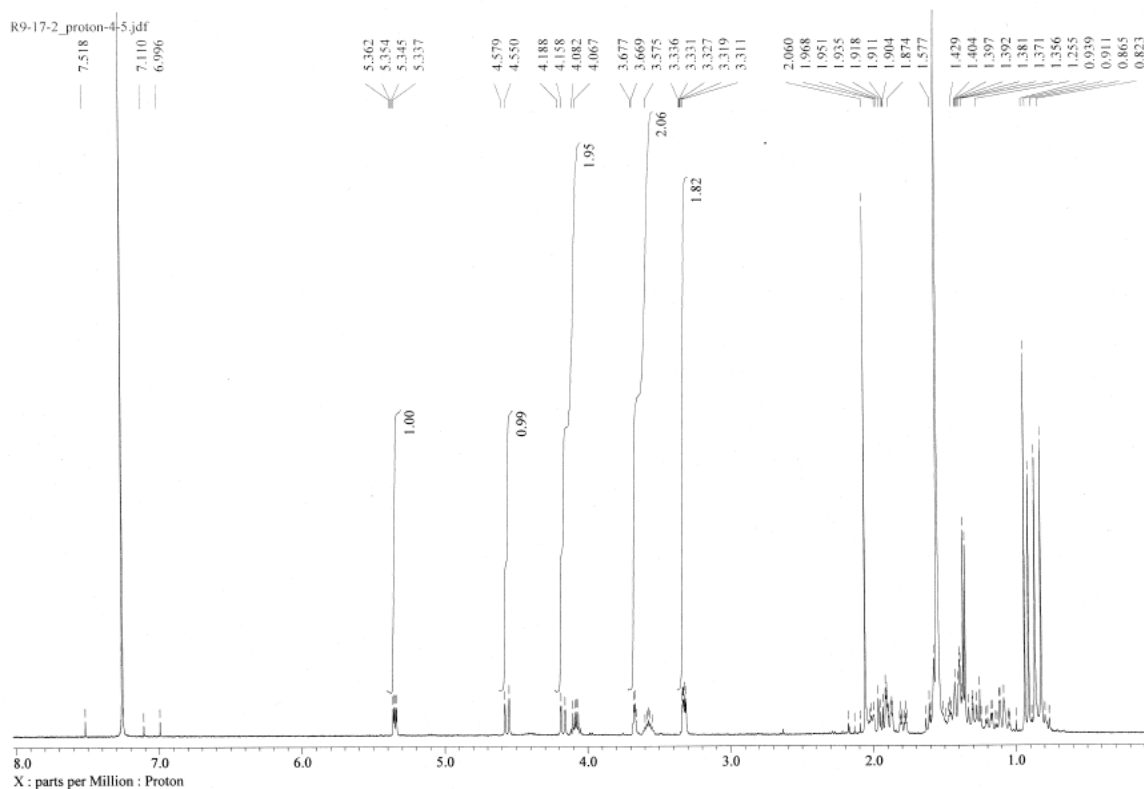

### S26. <sup>1</sup>H NMR spectrum (400 MHz) of compound 4 in CDCl<sub>3</sub>.

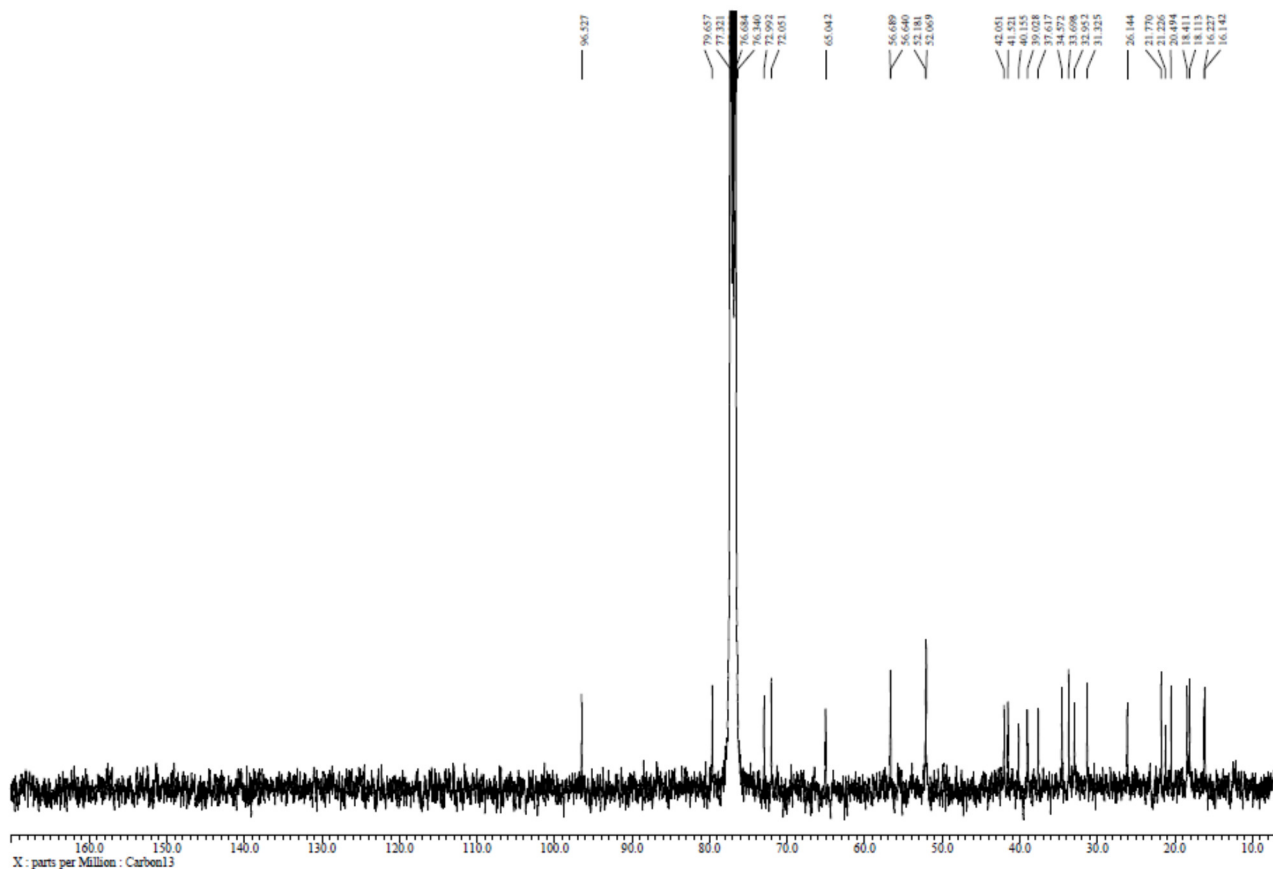

S27.  $^{13}\text{C}$  NMR spectrum (100 MHz) of compound **4** in  $\text{CDCl}_3$ .

R9-17-2\_dept-1-3.jdf Y = 135[deg]

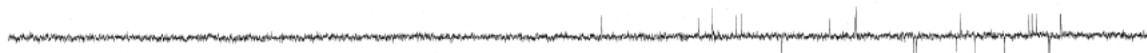

R9-17-2\_dept-1-4.jdf Y = 90[deg]

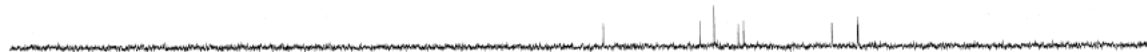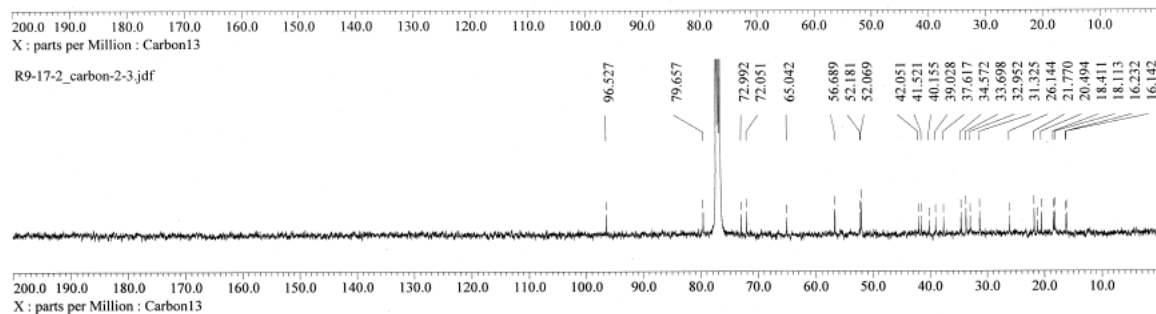

S28. DEPT spectrum (100 MHz) of compound **4** in  $\text{CDCl}_3$ .



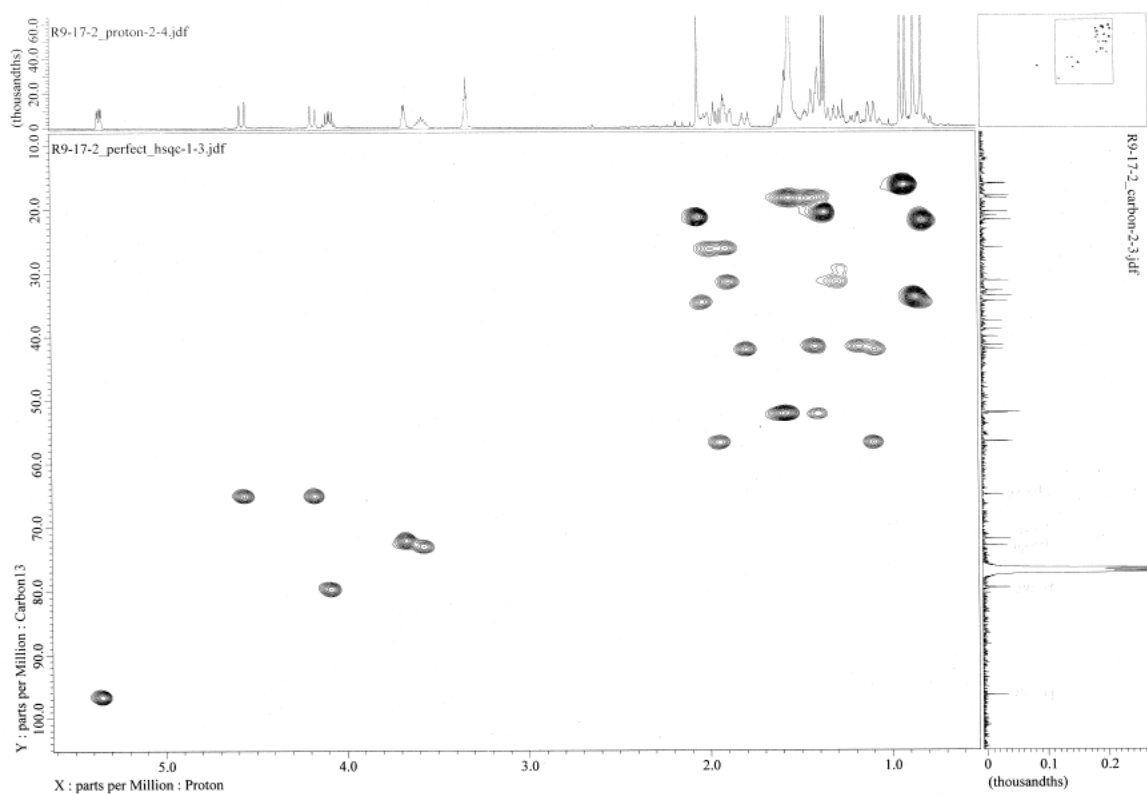

S29. HSQC spectrum of compound **4** in CDCl<sub>3</sub>.

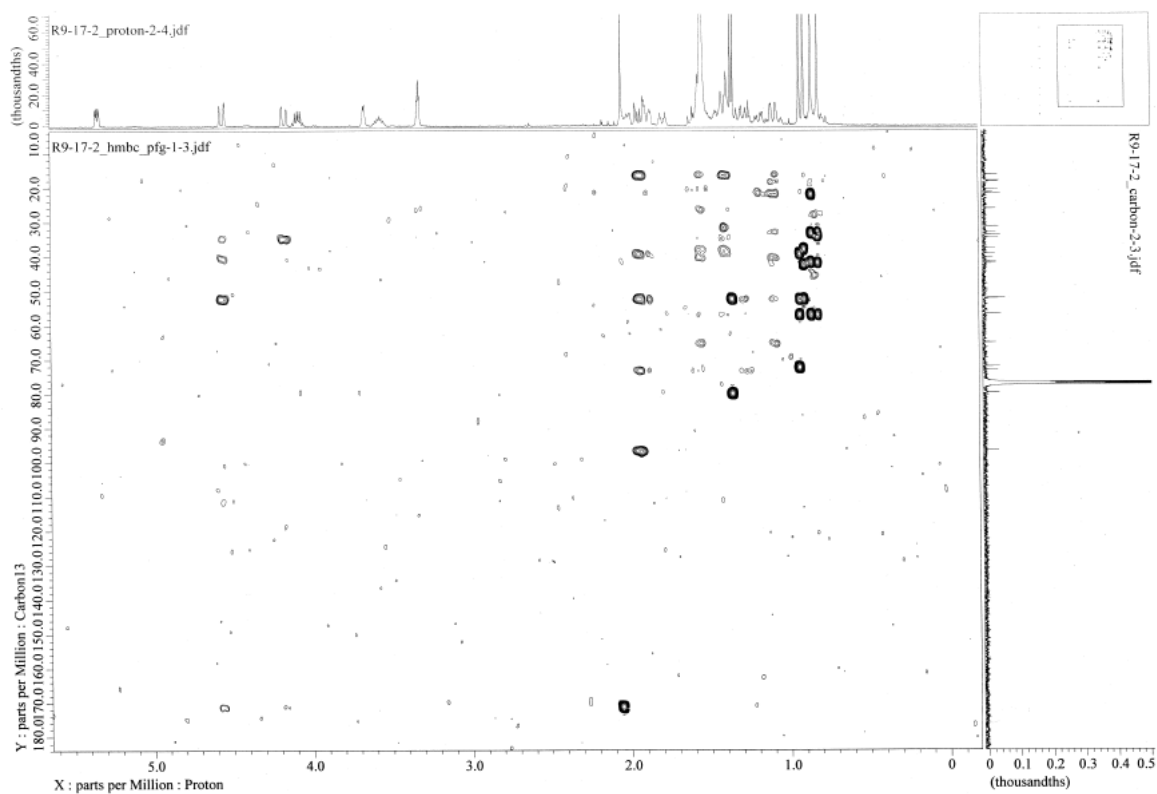

S30. HMBC spectrum of compound **4** in CDCl<sub>3</sub>.

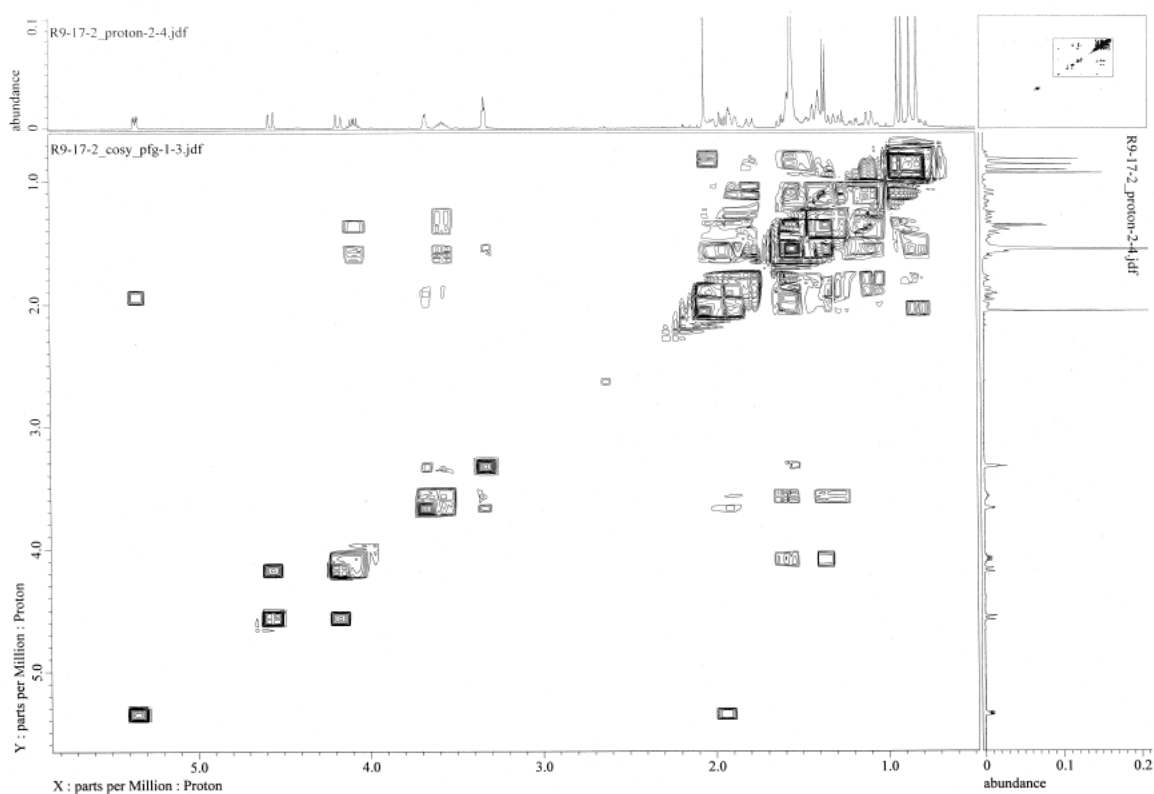

S31.  $^1\text{H}$ - $^1\text{H}$  COSY spectrum of compound **4** in  $\text{CDCl}_3$ .

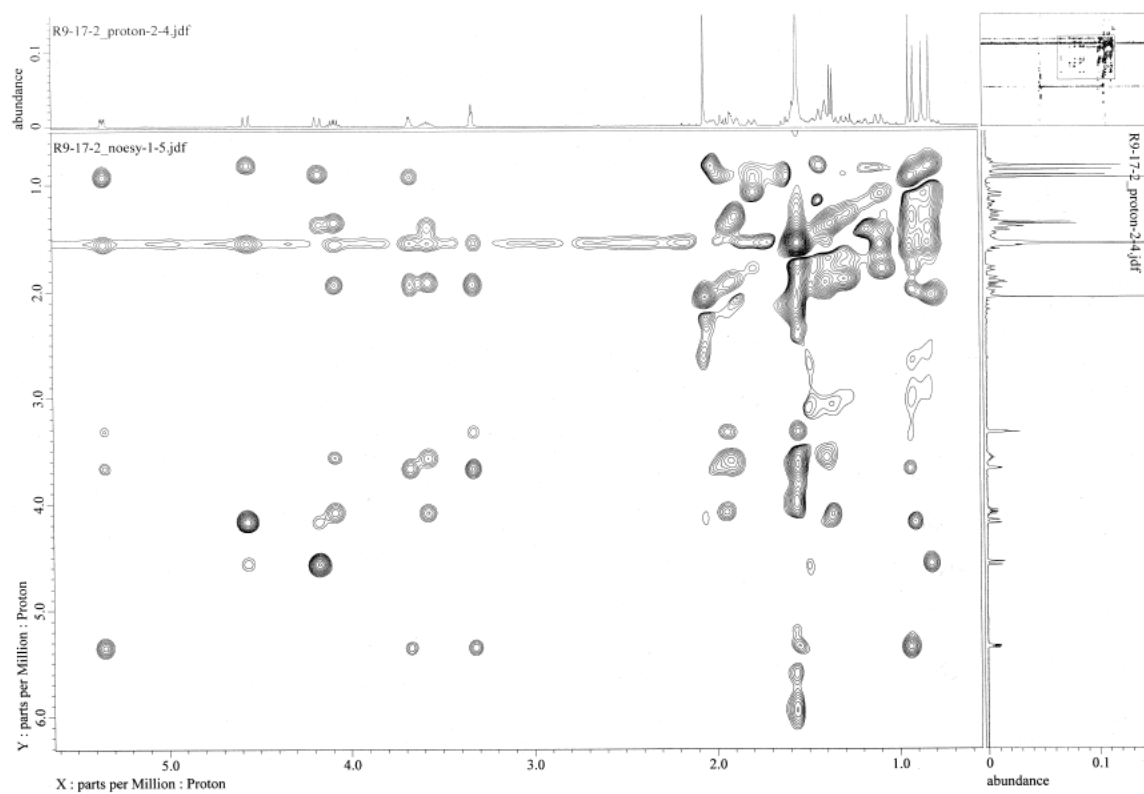

S32. NOESY spectrum of compound **4** in  $\text{CDCl}_3$

### Analysis Info

2/20/2020 4:22:20 PM  
Operator: YU HSIAO-CHING  
Instrument: BRUKER FT-MS solariX

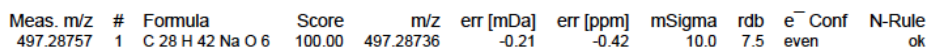

R9-4-7\_proton-1-2.jdf

X : parts per Million : Proton

7.511  
7.260  
7.256  
7.110  
6.996

4.683  
4.654  
4.318  
4.303  
4.295  
4.286  
4.189  
4.185  
4.159  
3.650  
3.639  
3.626  
3.613  
3.601  
3.588  
3.577  
3.186  
3.186  
3.151  
3.120  
2.597  
2.597  
2.571  
2.525  
2.519  
2.494  
2.369  
2.070  
2.060  
1.963  
1.897  
1.873  
1.861  
1.643  
1.554  
1.533  
1.518  
1.501  
1.496  
1.482  
1.475  
1.460  
1.446  
1.430  
1.378  
1.375  
1.175  
1.065  
0.869  
0.837

19

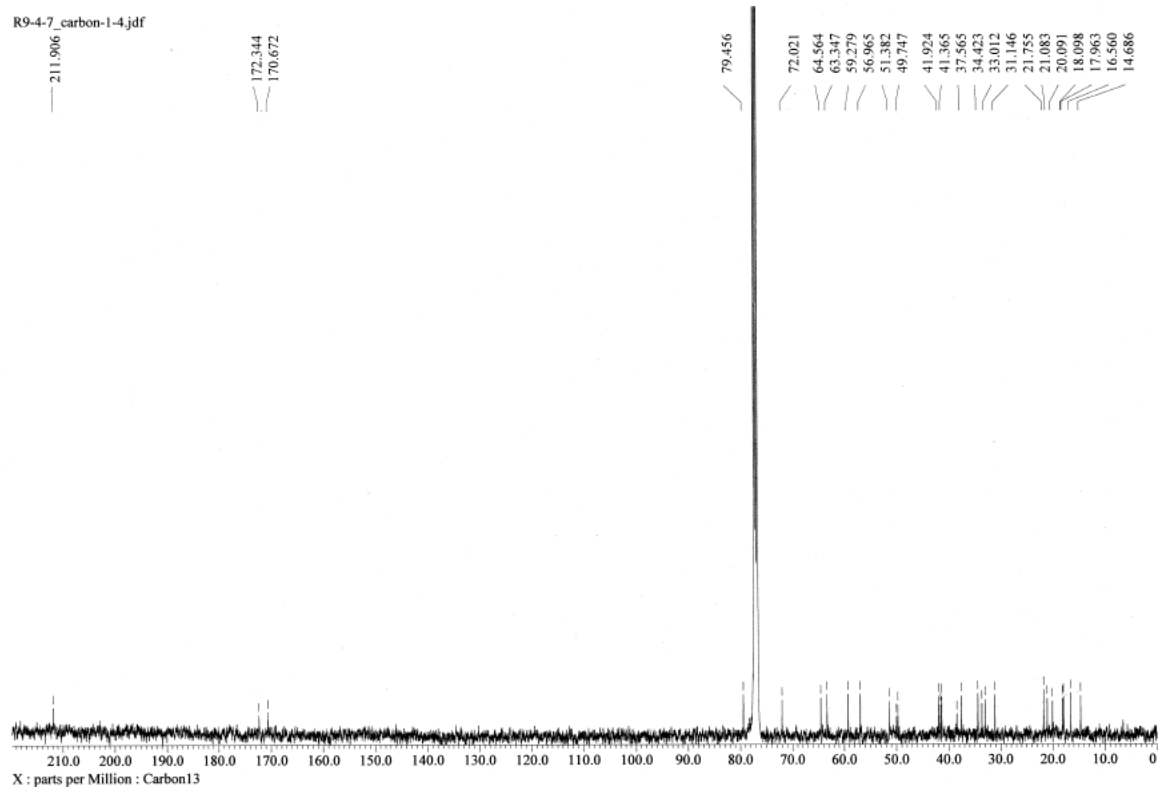

S35.  $^{13}\text{C}$  NMR spectrum (100 MHz) of compound **5** in  $\text{CDCl}_3$ .

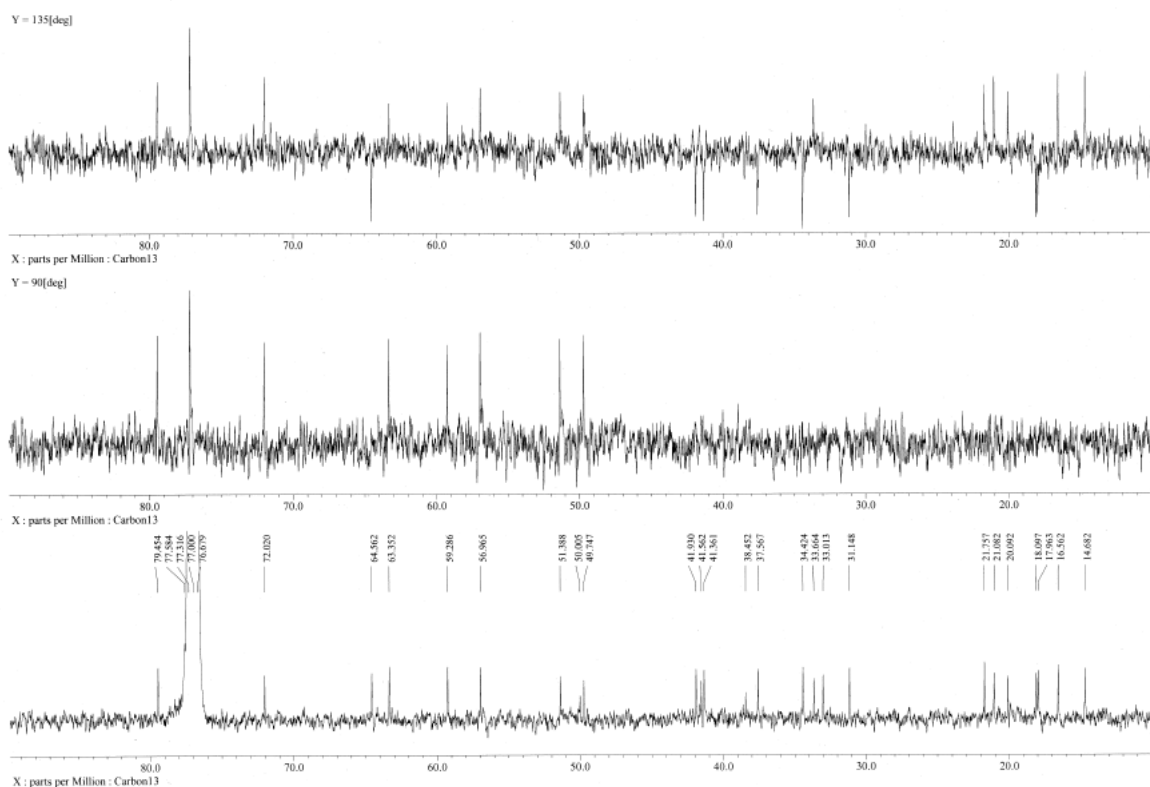

S36. DEPT spectrum (100 MHz) of compound **5** in  $\text{CDCl}_3$ .

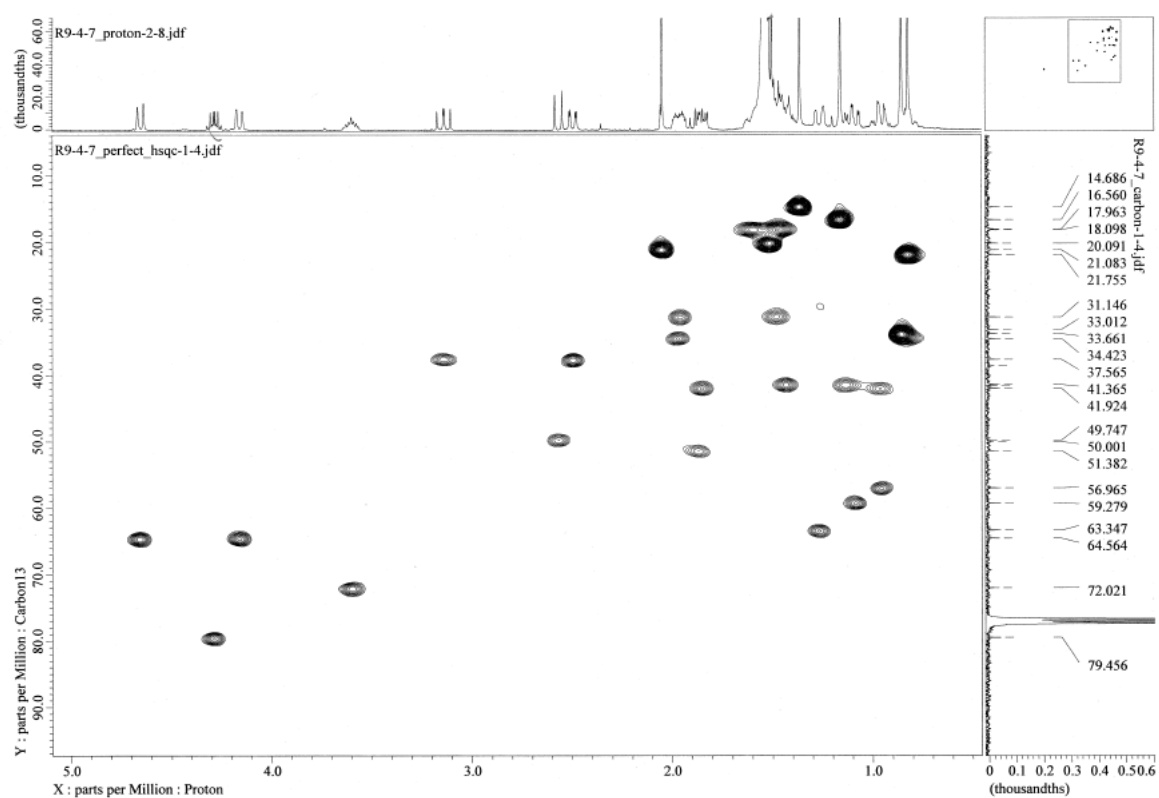

S37. HSQC spectrum of compound **5** in CDCl<sub>3</sub>.

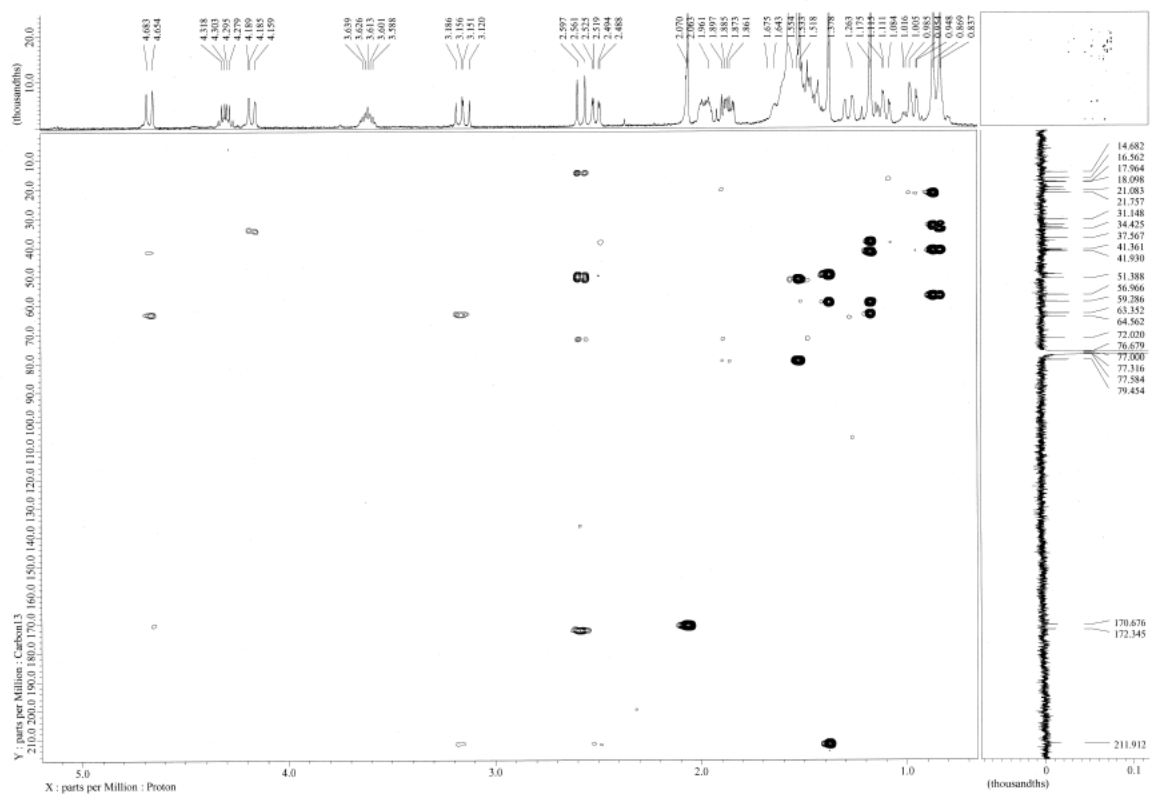

S38. HMBC spectrum of compound **5** in CDCl<sub>3</sub>.

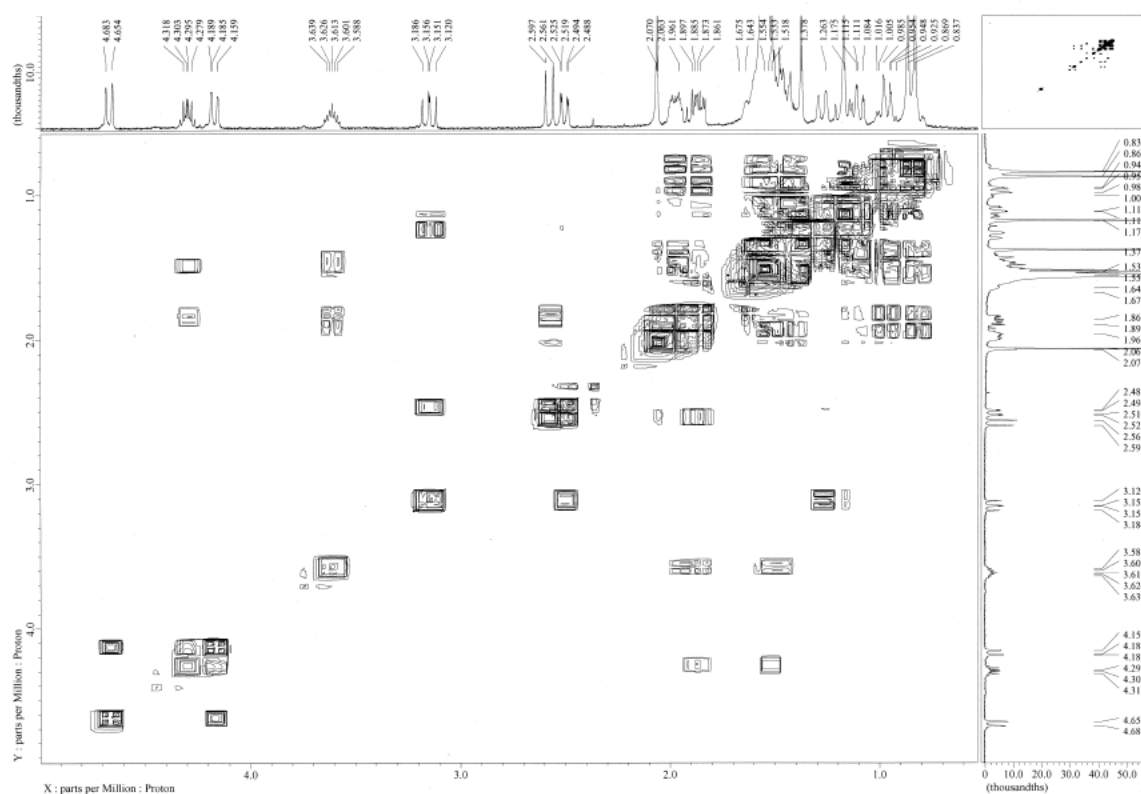

S39.  $^1\text{H}$ - $^1\text{H}$  COSY spectrum of compound **5** in  $\text{CDCl}_3$ .

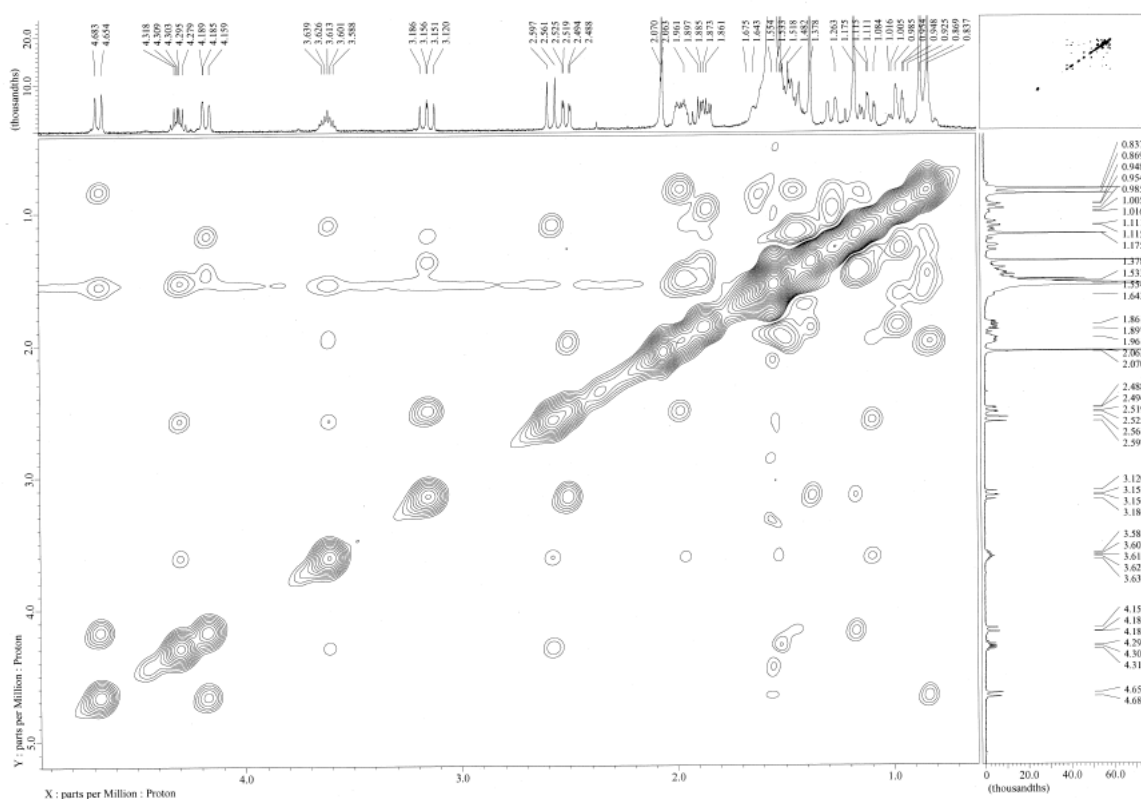

S40. NOESY spectrum of compound **5** in  $\text{CDCl}_3$

## Mass Spectrum SmartFormula Report

### Analysis Info

Analysis Name: D:\Data\2\R962\_000005.d  
 Method: broadband first signal  
 Sample Name: R-9-6-2  
 Comment: ESI Positive

1/7/2020 3:35:14 PM  
 Operator: YU HSIAO-CHING  
 Instrument: BRUKER FT-MS solarix

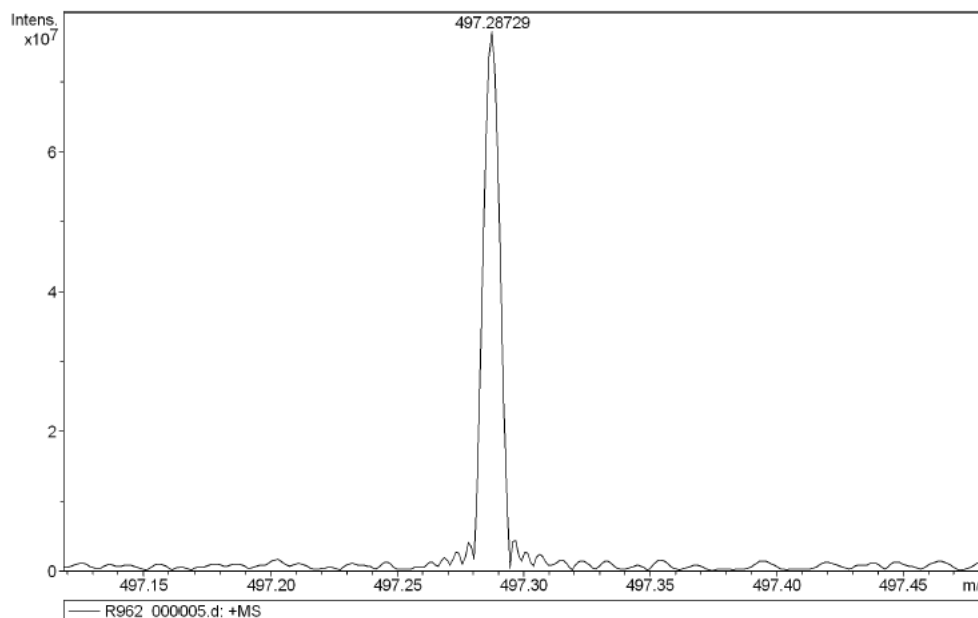

| Meas. m/z | # | Formula                                          | Score  | m/z       | err [mDa] | err [ppm] | mSigma | rdb | e <sup>-</sup> Conf | N-Rule |
|-----------|---|--------------------------------------------------|--------|-----------|-----------|-----------|--------|-----|---------------------|--------|
| 497.28729 | 1 | C <sub>28</sub> H <sub>42</sub> NaO <sub>6</sub> | 100.00 | 497.28736 | 0.07      | 0.13      | 9.6    | 7.5 | even                | ok     |

### S41. HRESIMS spectrum of compound **6**.

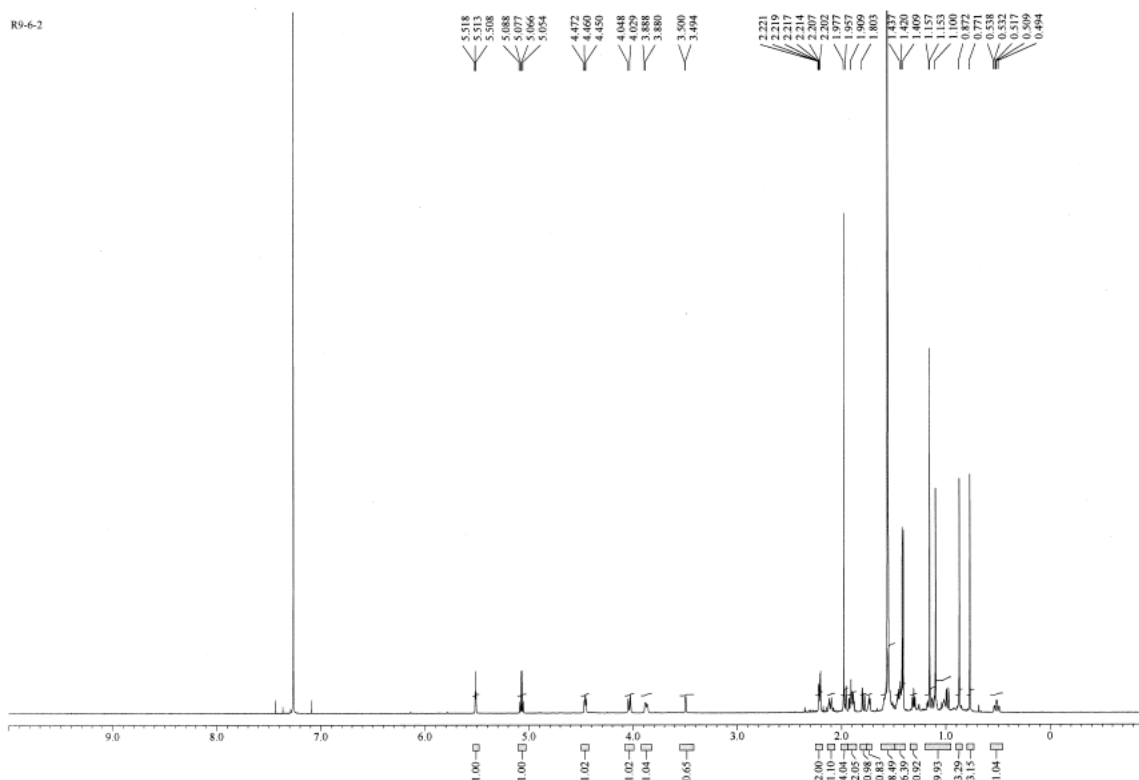

### S42. <sup>1</sup>H NMR spectrum (600 MHz) of compound **6** in CDCl<sub>3</sub>.

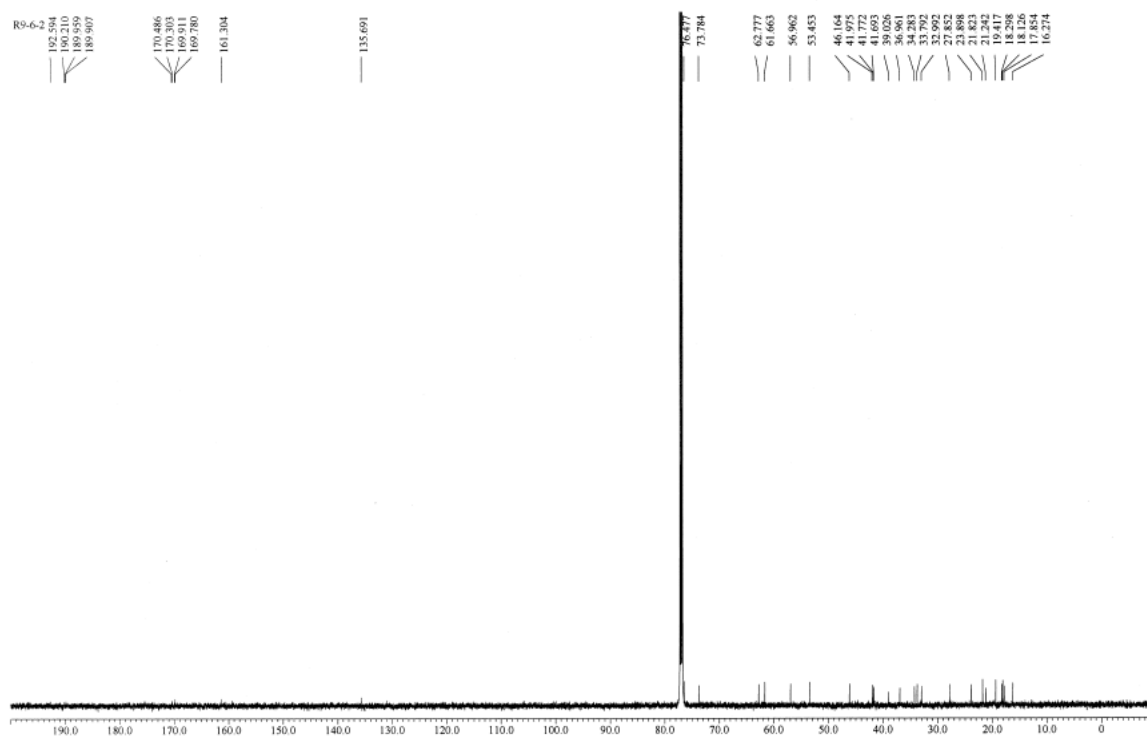

S43.  $^{13}\text{C}$  NMR spectrum (150 MHz) of compound **6** in  $\text{CDCl}_3$ .

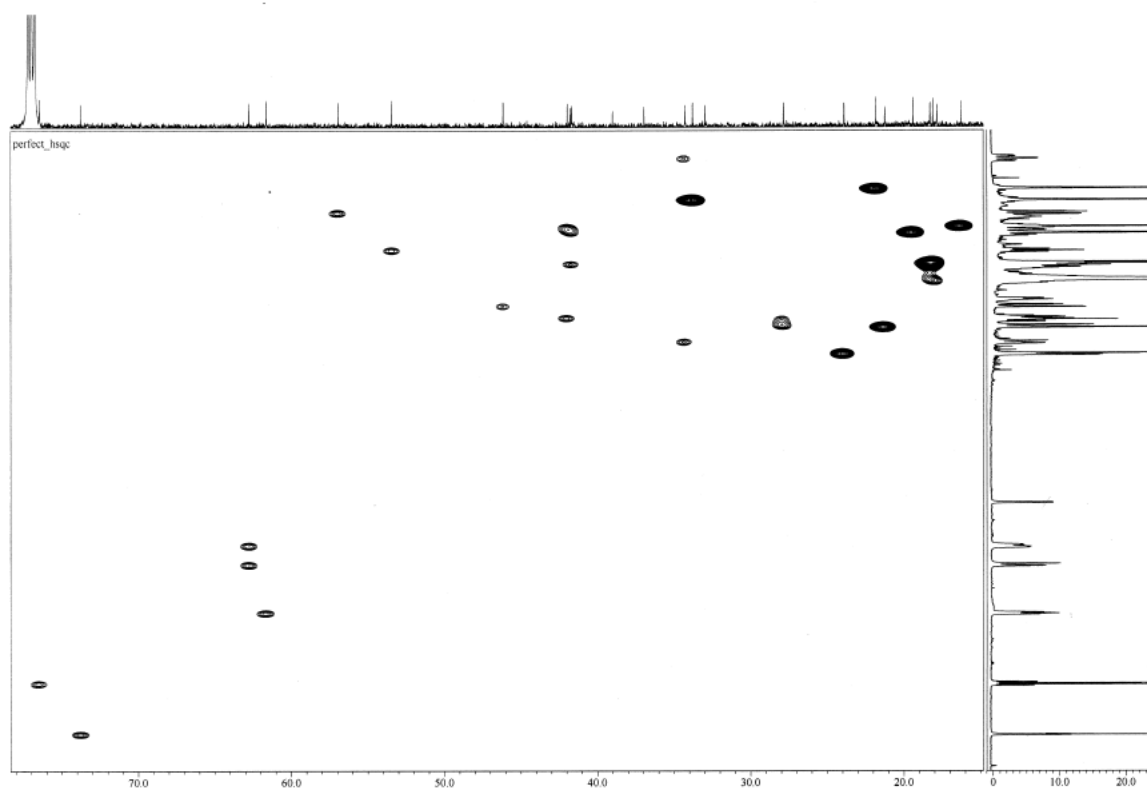

S44. HSQC spectrum of compound **6** in  $\text{CDCl}_3$ .



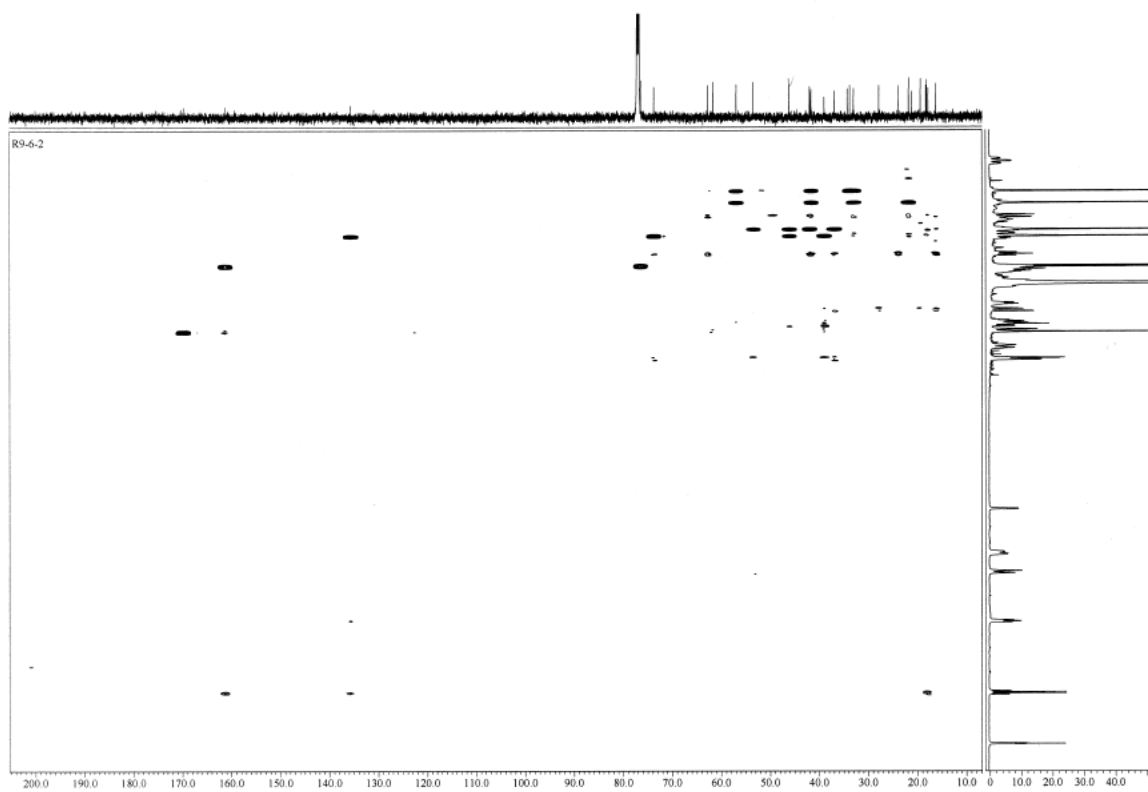

S45. HMBC spectrum of compound **6** in CDCl<sub>3</sub>.

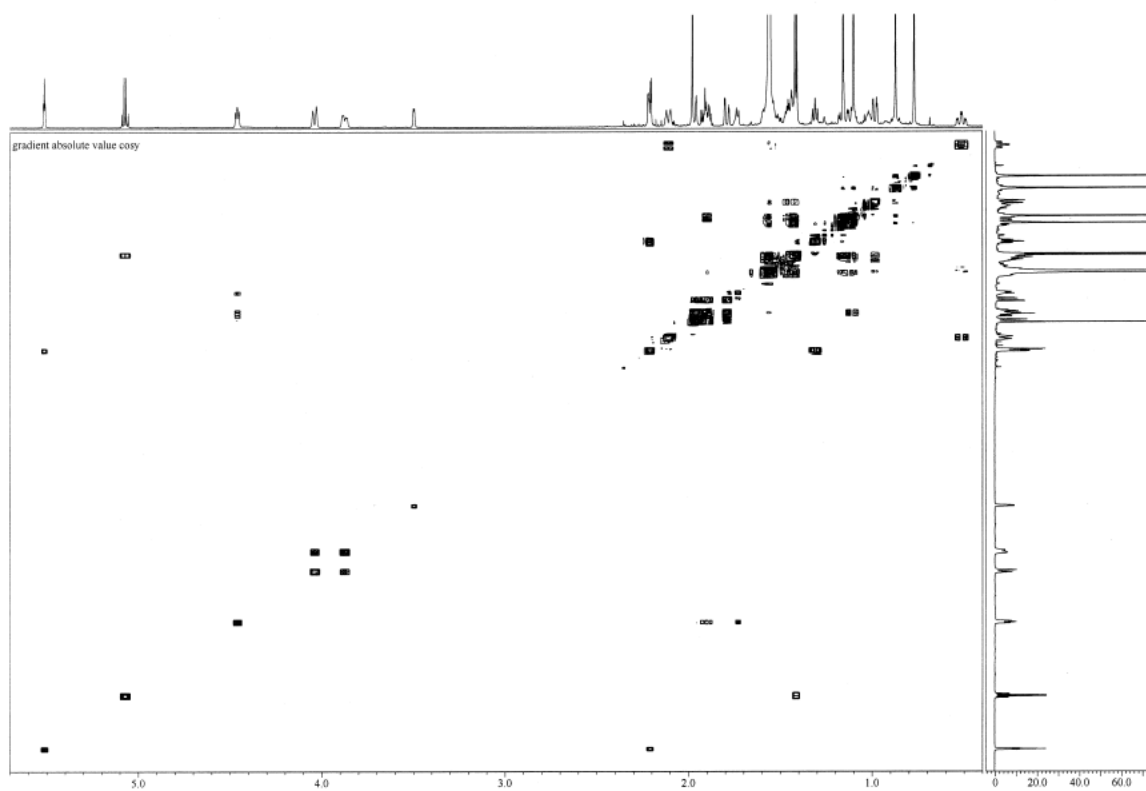

S46. <sup>1</sup>H-<sup>1</sup>H COSY spectrum of compound **6** in CDCl<sub>3</sub>.

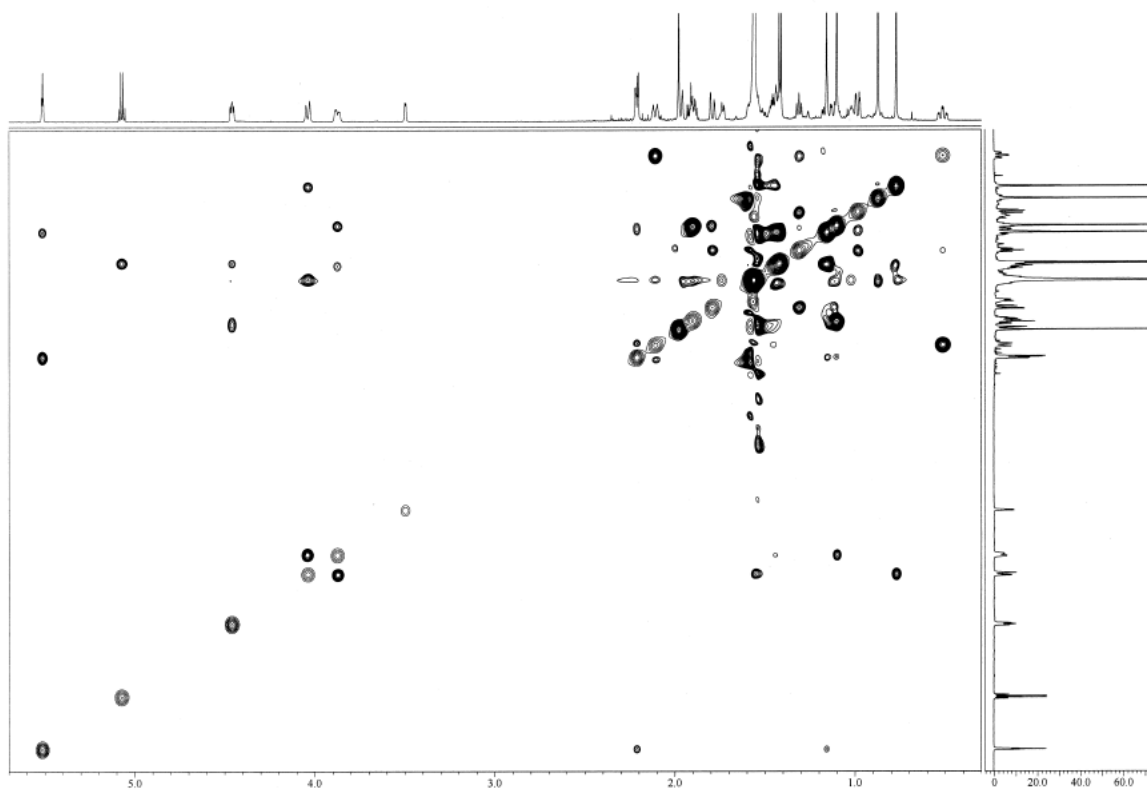

S47. NOESY spectrum of compound 6 in CDCl<sub>3</sub>
